# Supplementary material for: Bridging polymer architecture, printability, and properties by digital light processing of block copolycarbonates
Source: Royal Society of Chemistry journal article supplement (doi:10.1039/d4sc04593a), 2024-01-01
Supplement: d4sc04593a1.pdf [file d4sc04593a1.pdf]

## **Bridging Polymer Architecture, Printability, and Properties by Digital Light Processing of Block Copolycarbonates**

Krista Schoonover<sup>1†</sup>, Chia-Min Hsieh<sup>1†</sup>, Mani Sengoden<sup>1</sup>, Naushad Ahmed<sup>1</sup>, Manivannan S. Kalairaj<sup>2</sup>, Taylor H. Ware<sup>2,3</sup>, Donald J. Darensbourg<sup>1\*</sup>, Emily B. Pentzer<sup>1,3\*</sup>, Peiran Wei<sup>4\*</sup>

<sup>1</sup>Department of Chemistry, Texas A&M University, 3255 TAMU; College Station, TX 77843 (USA)

<sup>2</sup>Department of Biomedical Engineering, Texas A&M University, 3003 TAMU; College Station, TX 77843 (USA)

<sup>3</sup>Department of Materials Science and Engineering, Texas A&M University, 3003 TAMU; College Station, TX 77843 (USA)

<sup>4</sup>Soft Matter Facility Texas A&M University College Station, TX 77843, USA

<sup>†</sup>These two authors contributed equally.

<sup>\*</sup>Corresponding authors.

## Table of Contents

### 1. Synthesis and Characterization of Polymers

**Figures S1–S8.**  $^1\text{H}$  NMR spectra of the polymers

**Figure S9.** FTIR spectra of the polymers

**Figure S10.** SEC traces of the polymers

**Table S1.** Polymer composition, highlighting degree of polymerization

**Figure S11.** DOSY  $^1\text{H}$  NMR spectra of the polymers

**Figure S12.** TGA profiles of the polymers

**Figure S13.** MDSC profiles of the polymers, showing reversing and non-reversing heat-flow

**Equation S1.** Simplified law of mixing

**Equation S2.** Fox's Equation for composition-determined thermal transitions

**Table S2.** Thermodynamic properties based on law of mixing

### 2. Resin Formulation and 3D Printing

#### 2.1. 3D Printing of bulk structures

**Figure S14.** Curing control experiment images

**Figure S15.** DLP 3D printer setup

**Equation S3.** Calculation of resin stoichiometry

**Table S3.** Resin components

**Table S4.** Printing parameters

**Figure S16.** FTIR of printed objects

**Figure S17.** Schematic of uncrosslinked and uncrosslinkable polymer

**Figure S18.** Plot of % shrinkage vs mol% PVCHC

**Table S5.** Crosslinked polymer thermal properties and swelling ratio

**Figures S19–S23.** SEM images of surface and cross-section for all prints

**Figure S24.** Optical microscopy images of the surface of X-BCP<sub>49% $\text{H}$</sub>

#### 2.2. Thermal and mechanical properties of printed structures

**Table S6.** Comparison of thermal properties between pristine polymer and print

**Figure S25.** TGA profiles comparing pristine polymer to print

**Figure S26.** MDSC profiles comparing pristine polymer to print

**Figure S27.** Tensile stress-strain test result (DMA)

**Figure S28.** Plot of maximum tensile strength vs mol% PVCHC

**Figure S29.** Compression load-time result (nanoindentation)

**Table S7.** Table of all nanoindentation results

### 3. Hydrolysis of printed object

**Figure S30.** Cartoon of hydrolysis experiments

**Table S8.** Hydrolysis results for X-BCP<sub>49% $\text{A}$</sub>  in various conditions

**Table S9.** Hydrolysis results for all prints in 0.5 N NaOH + THF at 50 °C

**Figure S31.** Hydrolysis  $^1\text{H}$  NMR for X-Stat<sub>50% $\text{A}$</sub>  and X-BCP<sub>49% $\text{A}$</sub> .

### 4. References

## 1. Synthesis and Characterization of Polymers

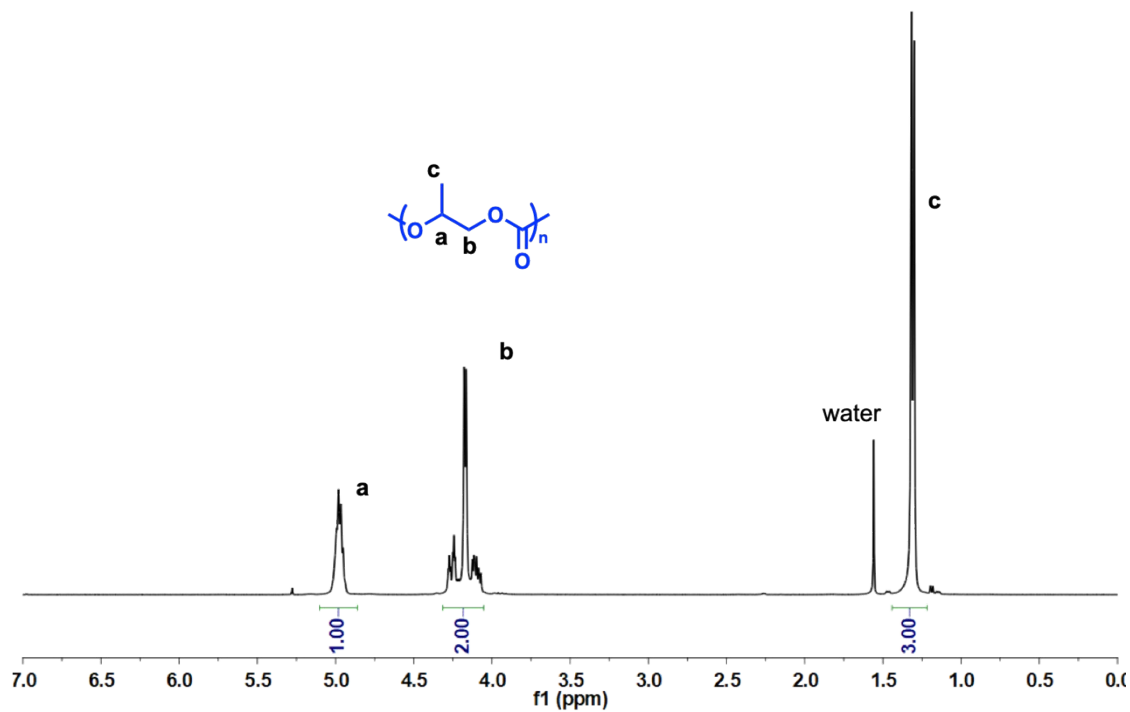

**Figure S1.**  $^1\text{H}$  NMR spectrum of  $P_{0\%A}$  in  $\text{CDCl}_3$ .

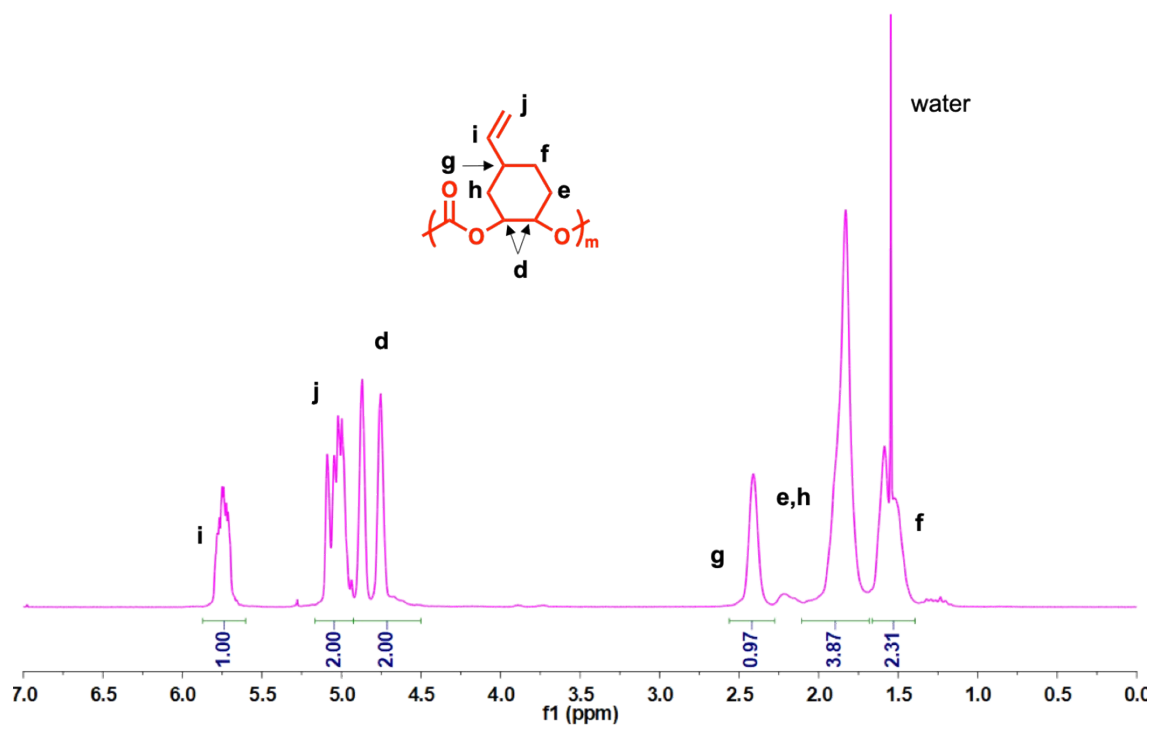

**Figure S2.**  $^1\text{H}$  NMR spectrum of  $P_{100\%A}$  in  $\text{CDCl}_3$ .

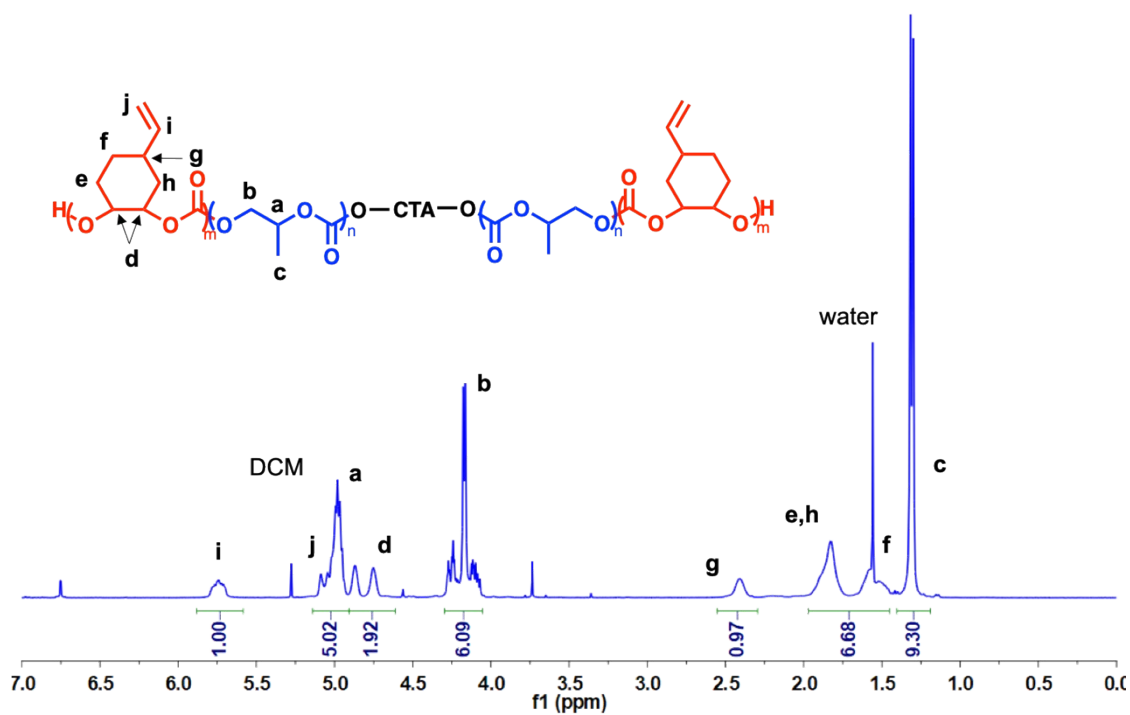

**Figure S3.**  $^1\text{H}$  NMR spectrum of BCP<sub>25%A</sub> in  $\text{CDCl}_3$ .

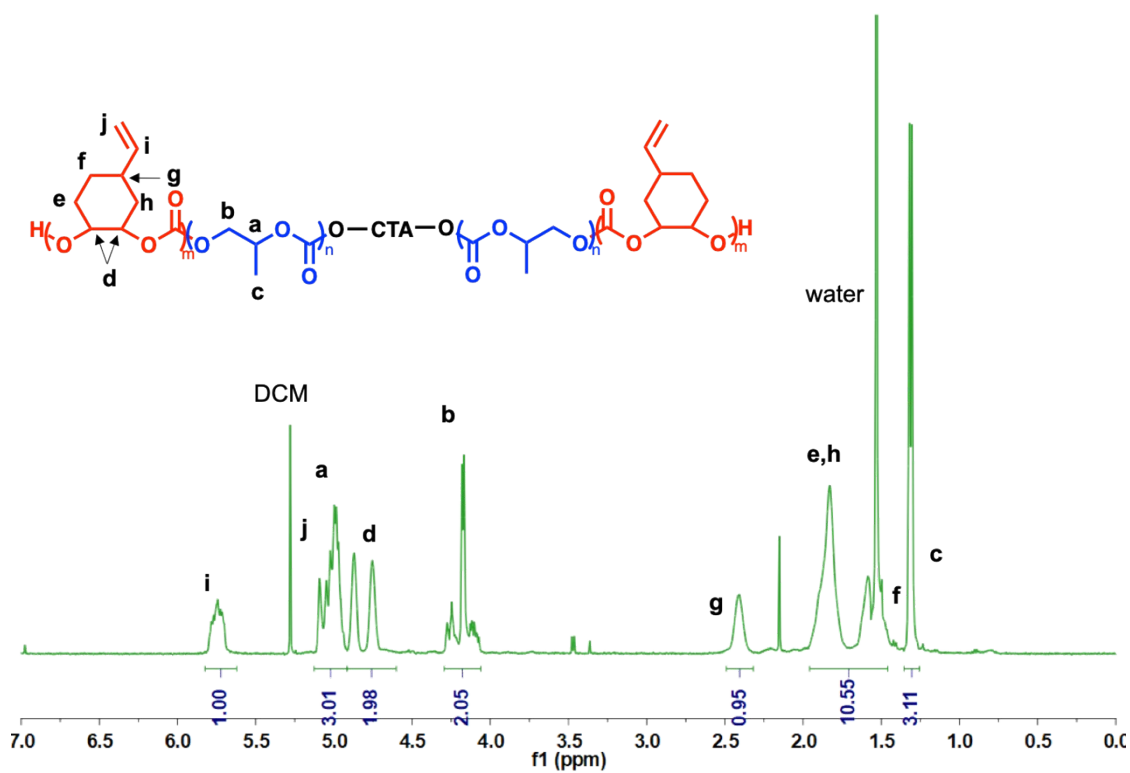

**Figure S4.**  $^1\text{H}$  NMR spectrum of BCP<sub>49%A</sub> in  $\text{CDCl}_3$ .

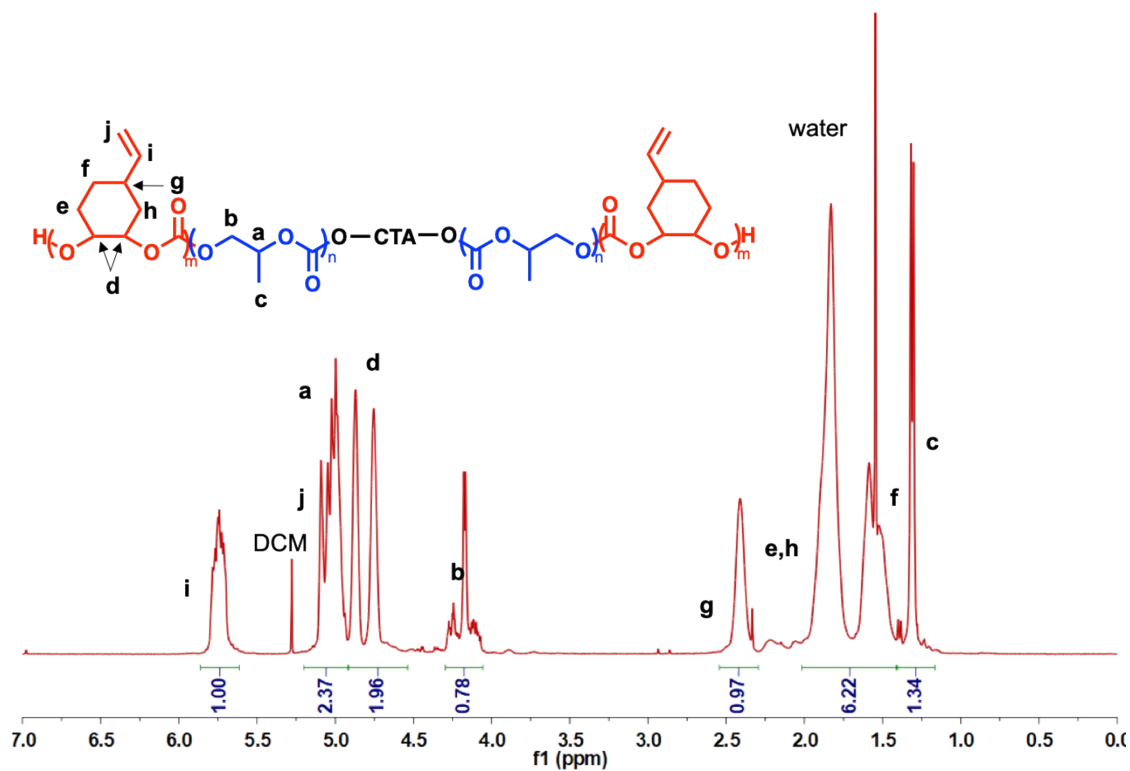

**Figure S5.**  $^1\text{H}$  NMR spectrum of  $\text{BCP}_{72\%A}$  in  $\text{CDCl}_3$ .

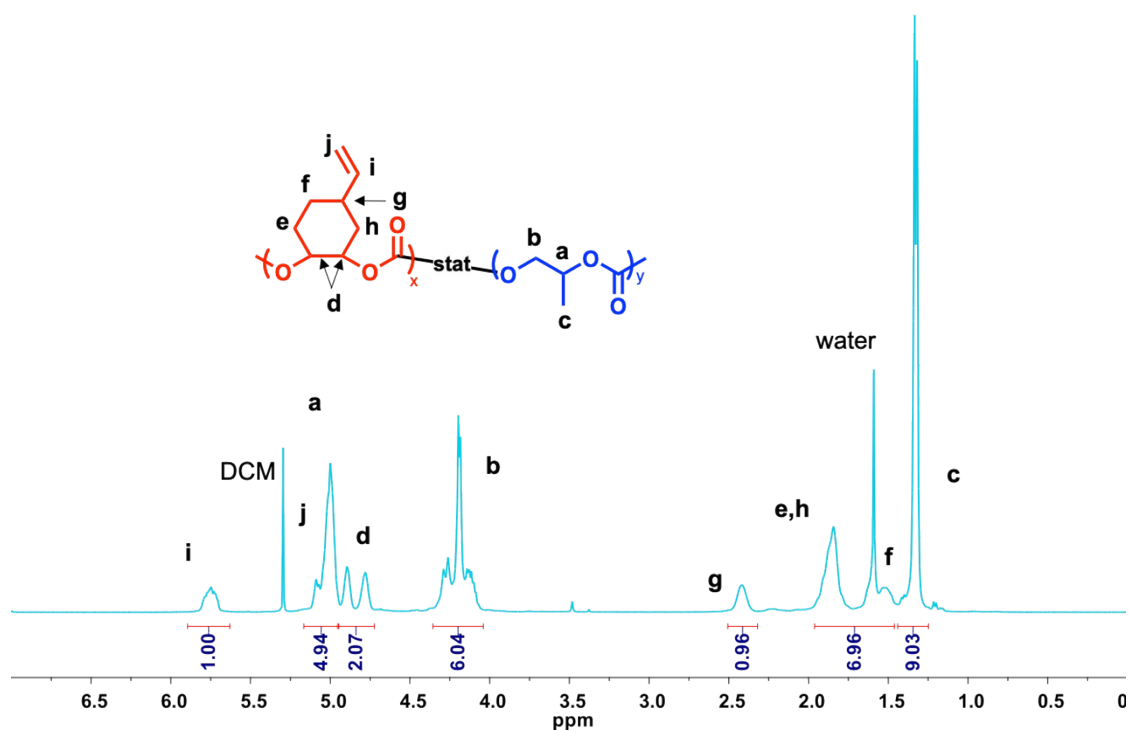

**Figure S6.**  $^1\text{H}$  NMR spectrum of  $\text{Stat}_{24\%A}$  in  $\text{CDCl}_3$ .

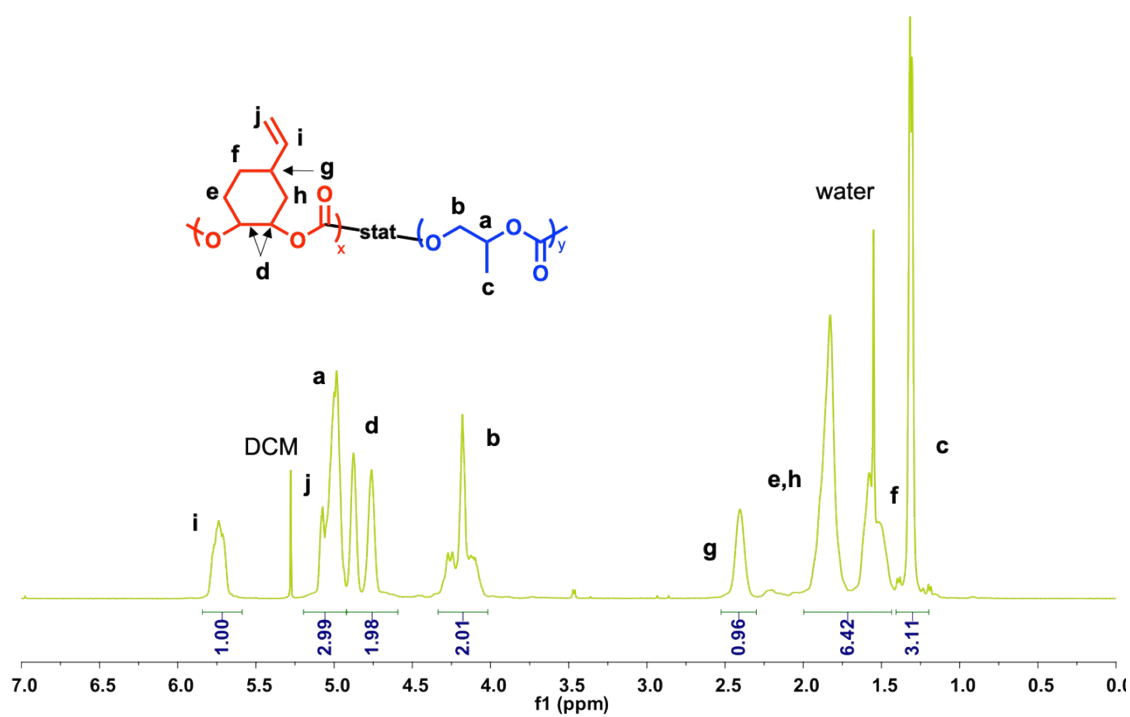

**Figure S7.** <sup>1</sup>H NMR spectrum of Stat<sub>50%A</sub> in CDCl<sub>3</sub>.

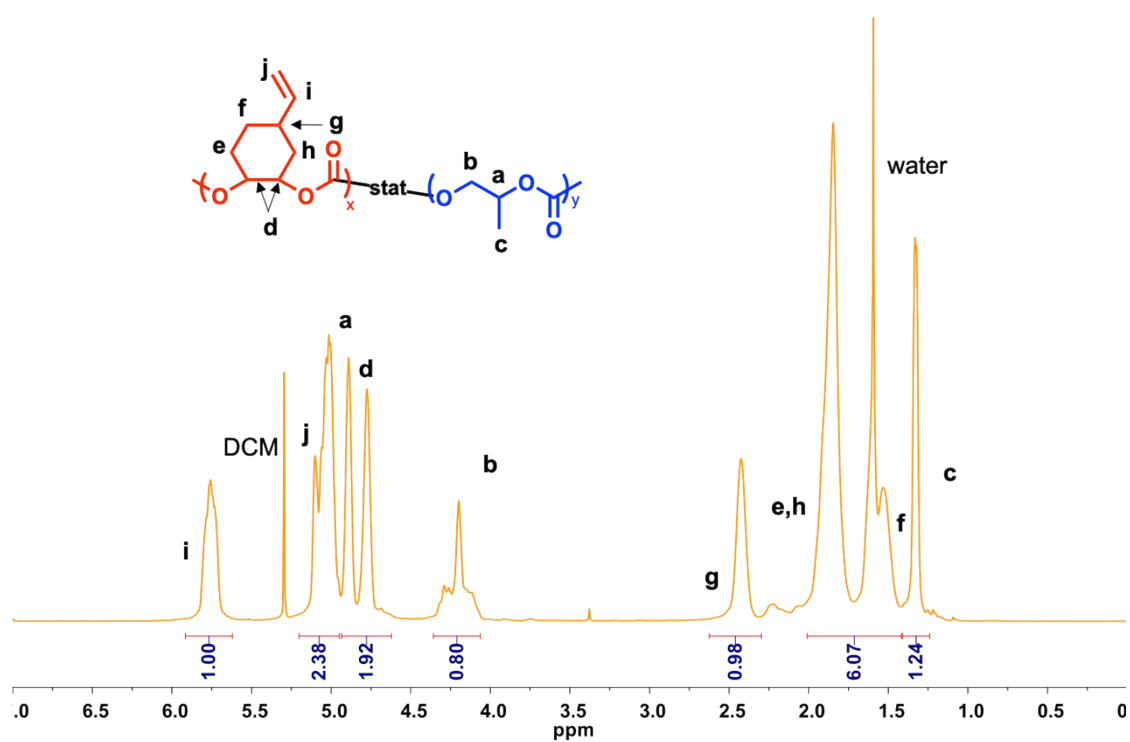

**Figure S8.** <sup>1</sup>H NMR spectrum of Stat<sub>71%A</sub> in CDCl<sub>3</sub>.

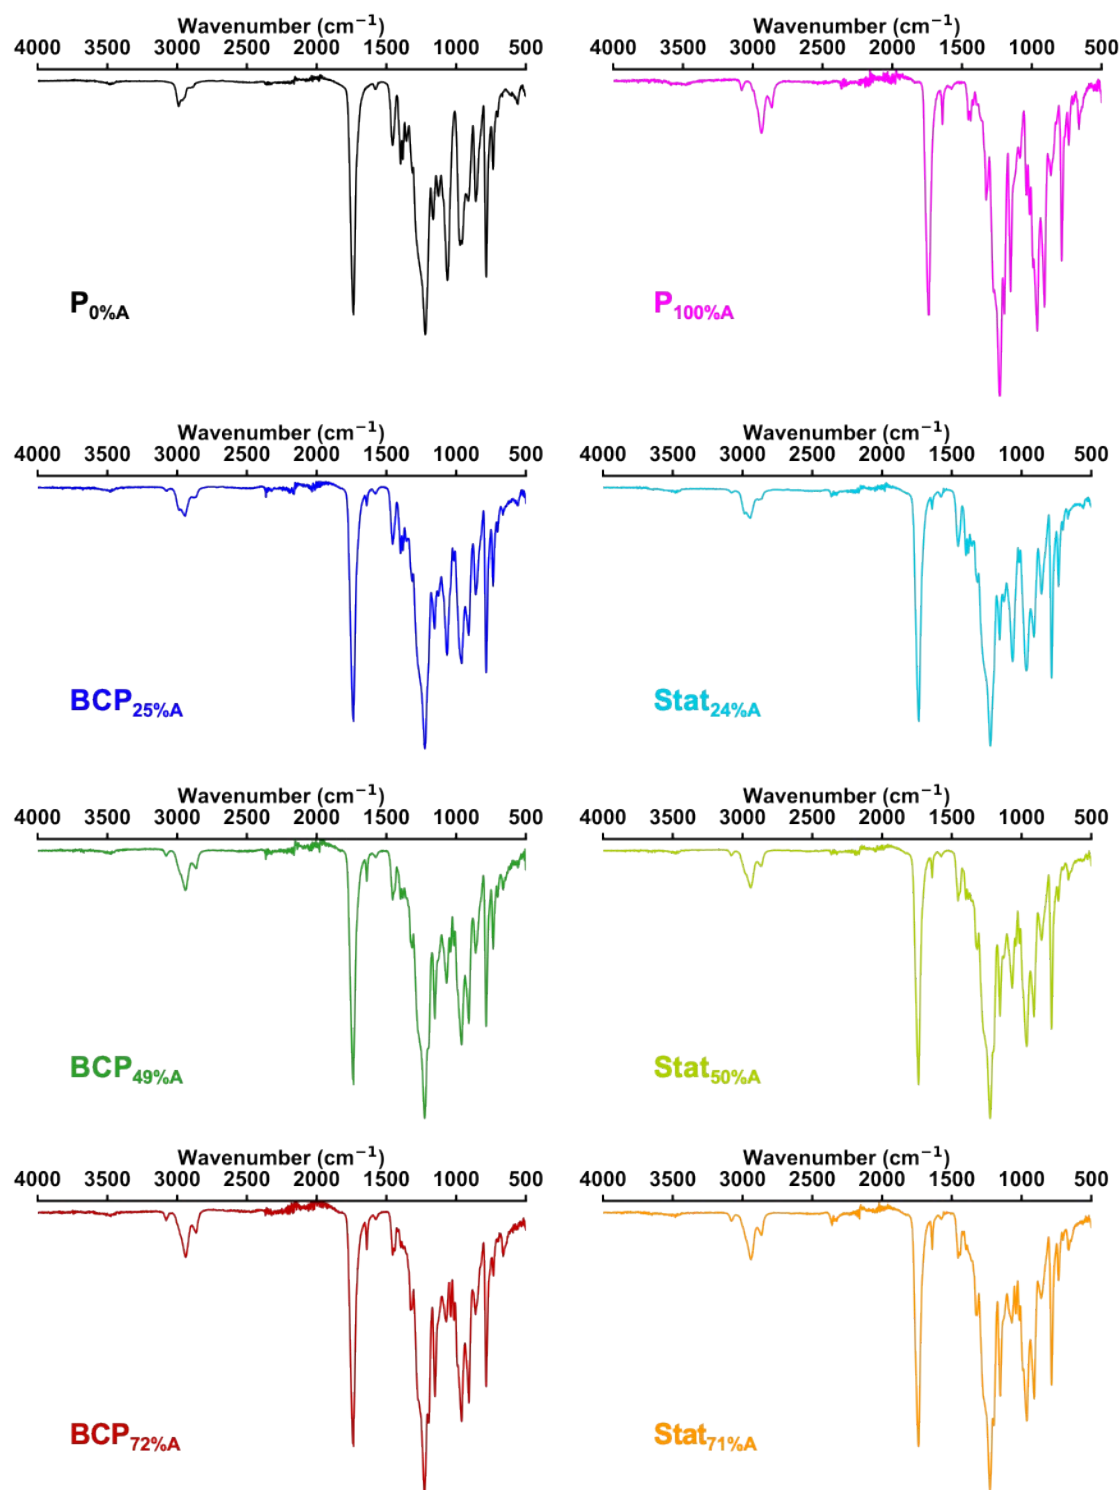

**Figure S9.** FTIR for each polymer. All spectra are normalized to the signal at 1720 cm<sup>-1</sup> corresponding to the C=O stretch.

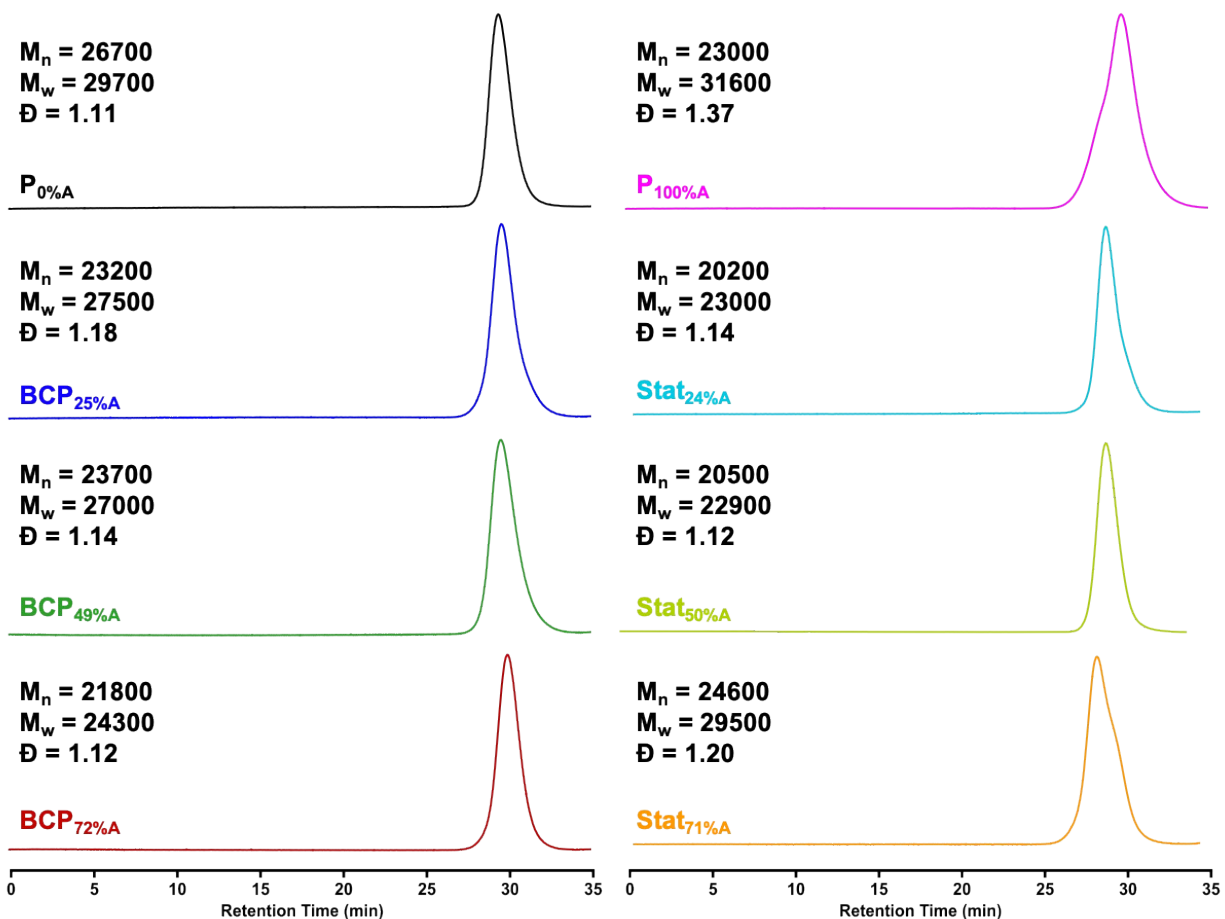

**Figure S10.** SEC traces for each polymer, normalized to intensity of 1.

**Table S1.** Polymer composition of BCP, Stat, and Homo aPCs used for DLP.

| Polymer        | <sup>a</sup> PC:VCHC | <sup>b</sup> $M_n$ (kDa) | <sup>b</sup> $\bar{D}$ | <sup>c</sup> $N_{PO}$ | <sup>c</sup> $N_{VCHO}$ | <sup>c</sup> $N$ |
|----------------|----------------------|--------------------------|------------------------|-----------------------|-------------------------|------------------|
| $P_{0\%A}$     | 1.00 : 0             | 26.7                     | 1.11                   | 262                   | 0                       | 262              |
| $P_{100\%A}$   | 0.00 : 1             | 23.0                     | 1.37                   | 0                     | 137                     | 137              |
| $BCP_{25\%A}$  | 3.05 : 1             | 23.2                     | 1.18                   | 147                   | 49                      | 196              |
| $BCP_{49\%A}$  | 1.03 : 1             | 23.7                     | 1.14                   | 90                    | 86                      | 176              |
| $BCP_{72\%A}$  | 0.39 : 1             | 21.8                     | 1.12                   | 41                    | 105                     | 146              |
| $Stat_{24\%A}$ | 3.223 : 1            | 20.2                     | 1.14                   | 130                   | 41                      | 171              |
| $Stat_{50\%A}$ | 1.01 : 1             | 20.5                     | 1.12                   | 76                    | 76                      | 152              |
| $Stat_{71\%A}$ | 0.40 : 1             | 24.6                     | 1.20                   | 48                    | 117                     | 165              |

[a] Determined by  $^1H$  NMR integration. [b] Determined by SEC in THF against PS standards. [c] Number of repeat units of each monomer based on  $M_n$  and molar ratio.

Figure S11.  $^1\text{H}$  NMR DOSY in  $\text{CDCl}_3$  for all polymers.

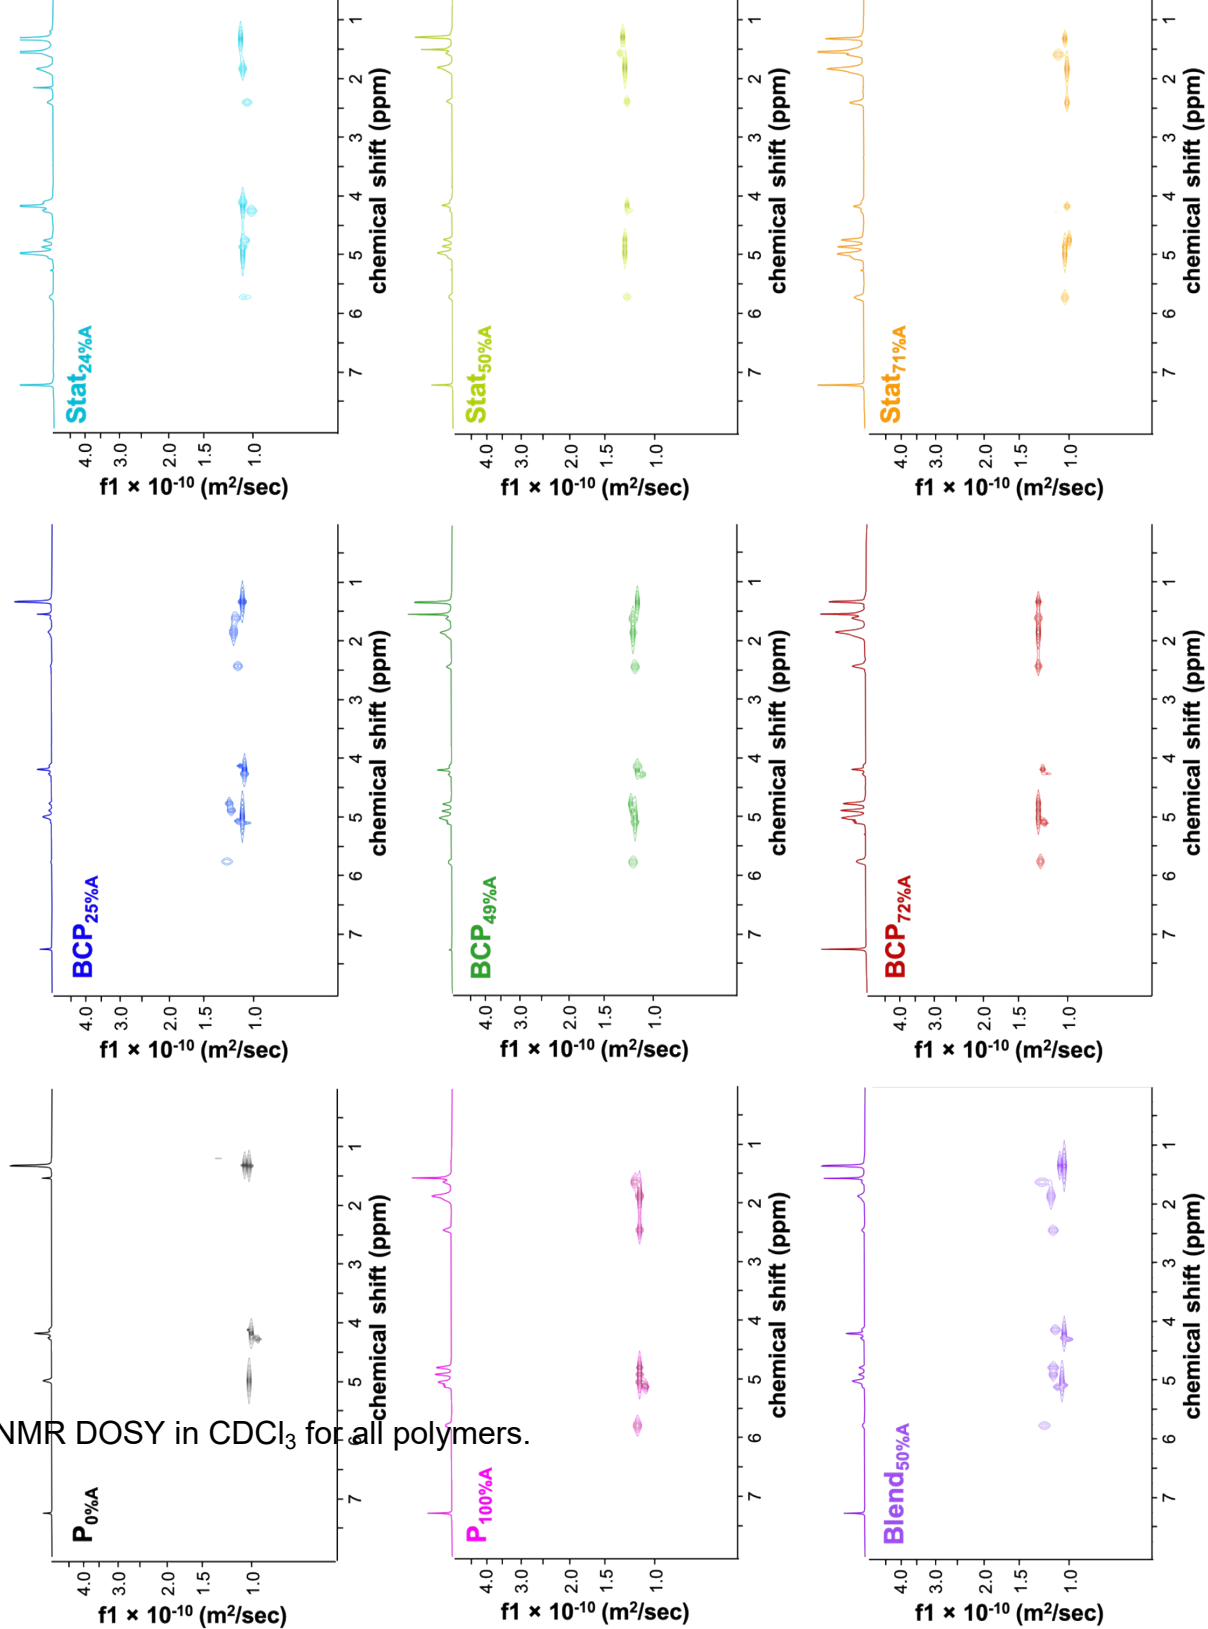

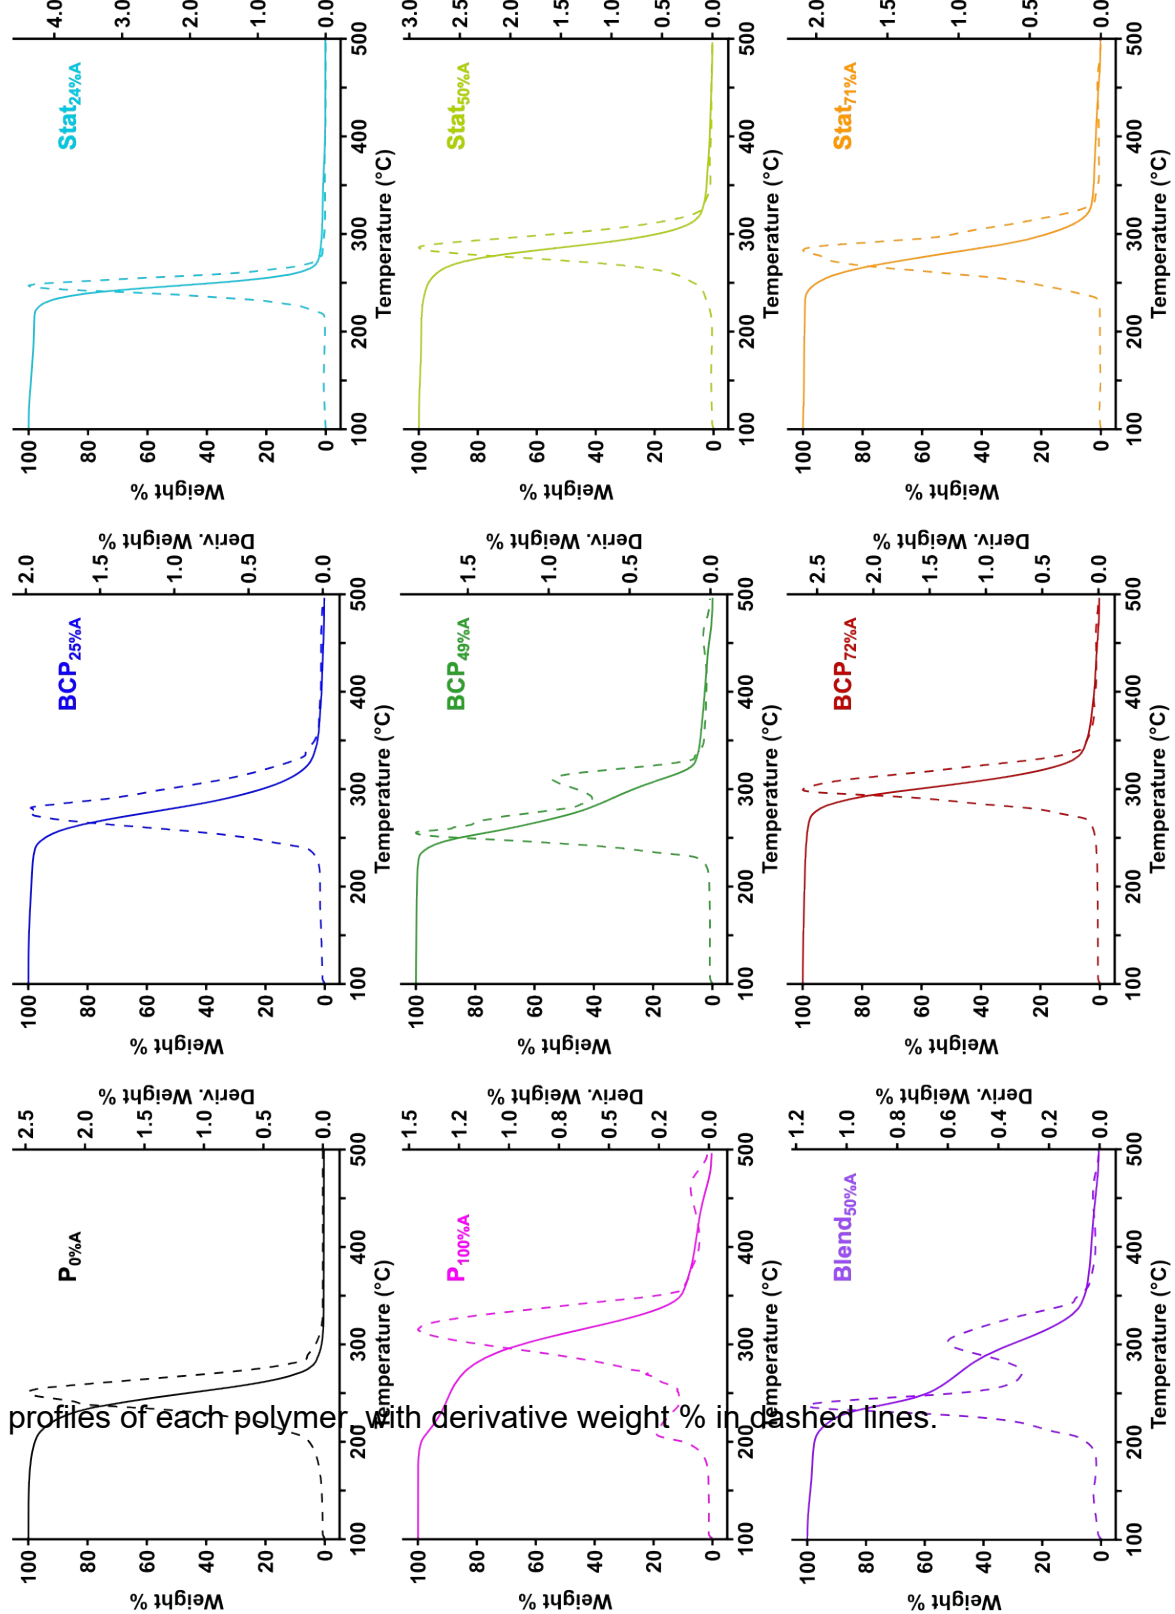

**Figure S12.** TGA profiles of each polymer with derivative weight % in dashed lines.

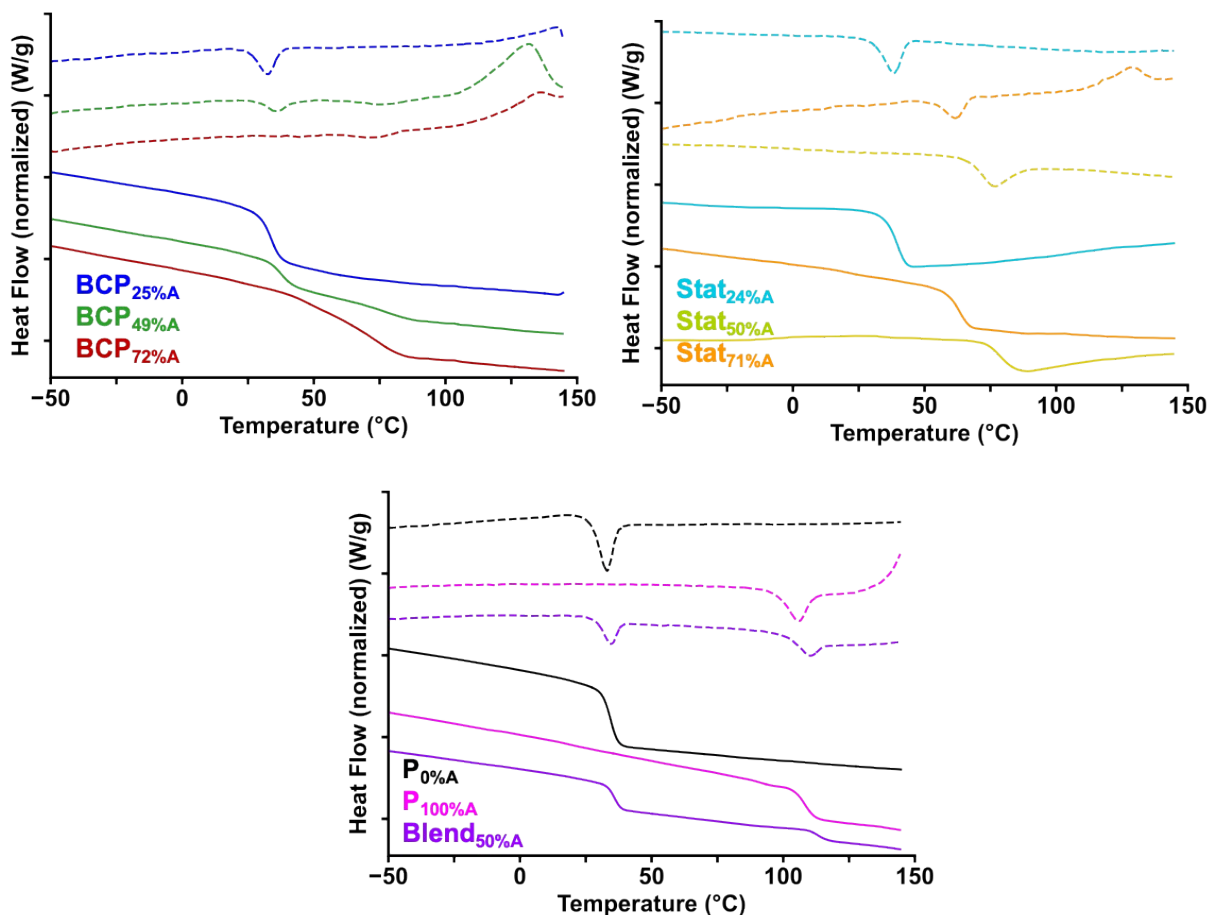

**Figure S13.** Modulated DSC for each polymer and the blend, separated into normalized nonreversing (dashed) and reversing (solid) heat flow. Y-axis tick marks are 0.02 W/g for all plots.

**Equation S1.** Linear combination of decomposition temperatures  $T_{d1}$  and  $T_{d2}$  (K) of homopolymers based on the weight fractions  $w_1$  and  $w_2$  of each component in the copolymer:

$$T_{d,mix} = w_1 T_{d1} + w_2 T_{d2} \quad (S1)$$

**Equation S2.** Fox equation<sup>1</sup> to describe composition dependence of thermal properties  $T_{g,mix}$  (K) of copolymers, where  $w_1$  and  $w_2$  are the weight fractions of each component:

$$\frac{1}{T_{g,mix}} = \frac{w_1}{T_{g1}} + \frac{w_2}{T_{g2}} \quad (S2)$$

**Table S2.** Comparison of experimental and calculated thermodynamic properties using **Equations S1** and **S2**.

| Polymer              | w <sub>A</sub> | w <sub>B</sub> | T <sub>d</sub> (K) | T <sub>d,mix</sub> (K) | T <sub>g</sub> (K) | T <sub>g,mix</sub> (K) |
|----------------------|----------------|----------------|--------------------|------------------------|--------------------|------------------------|
| BCP <sub>25%A</sub>  | 0.35           | 0.65           | 551                | 546                    | 307                | 330                    |
| BCP <sub>49%A</sub>  | 0.61           | 0.39           | 528, 582           | 563                    | 311, 354           | 349                    |
| BCP <sub>72%A</sub>  | 0.81           | 0.19           | 573                | 576                    | 339                | 364                    |
| Stat <sub>24%A</sub> | 0.34           | 0.66           | 520                | 545                    | 312                | 329                    |
| Stat <sub>50%A</sub> | 0.62           | 0.38           | 559                | 564                    | 336                | 349                    |
| Stat <sub>71%A</sub> | 0.80           | 0.20           | 556                | 575                    | 352                | 364                    |

## 2. Resin Formulation and 3D Printing

### 2.1. 3D Printing of bulk structures

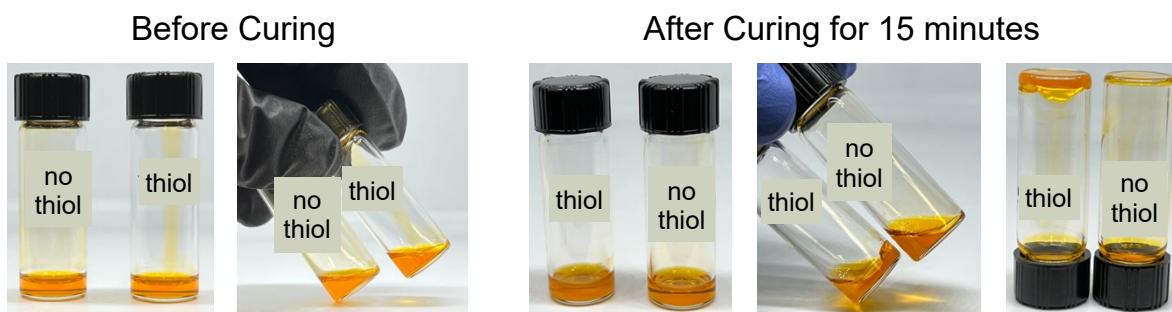

**Figure S14.** Curing control experiment. The same resin formulation was used for two samples, except no thiol was added to one. Both were exposed to the DLP printer light for 15 minutes.

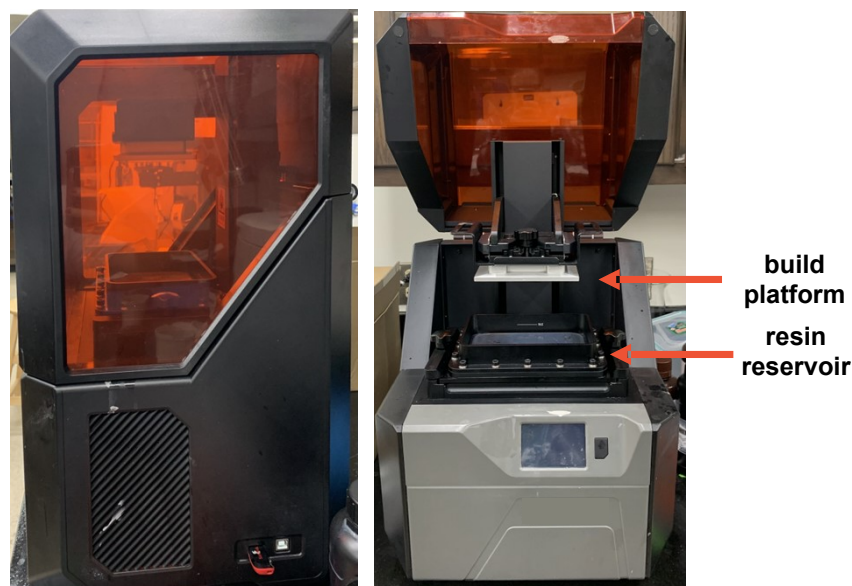

**Figure S15.** DLP 3D printer used in this work.

**Equation S3.** Calculation of resin stoichiometry of crosslinker relative to polymer:

$$\begin{aligned} \text{moles of alkene} &= \frac{\text{mol\% PVCHC} \times M_n}{((\text{mass}_{\text{PPC repeat unit}} \times \text{mol\% PPC}) + (\text{mass}_{\text{PVCHC repeat unit}} \times \text{mol\% PVCHC}))} \\ &= \frac{\left( \left( 102 \frac{\text{g}}{\text{mol}} \times \text{mol\% PPC} \right) + \left( 168 \frac{\text{g}}{\text{mol}} \times \text{mol\% PVCHC} \right) \right)}{\text{mol\% PVCHC} \times M_n} \end{aligned}$$

**Table S3.** Resin components

| Resin components   | Specific Name                    | Amount                 |
|--------------------|----------------------------------|------------------------|
| Solvent            | Propylene Carbonate              | 3:1 v/v                |
|                    | Ethyl Acetate                    |                        |
| Polymer            | Polycarbonate (BCP, Stat, Blend) | 450 mg/mL              |
| Crosslinking Agent | 1,6-hexanedithiol                | relative to mol% PVCHC |
| Photoinitiator     | BAPO                             | 0.5 wt%                |
| Radical Inhibitor  | 1,2,3-trihydroxybenzene          | 0.1 wt%                |
| Dye                | Sudan I                          | 0.02 wt%               |

**Table S4.** Printing parameters

| Parameter        | Value             |
|------------------|-------------------|
| Curing time      | 60 s              |
| Layer height     | 100 $\mu\text{m}$ |
| Light Wavelength | 405 nm            |

Light intensity

200%

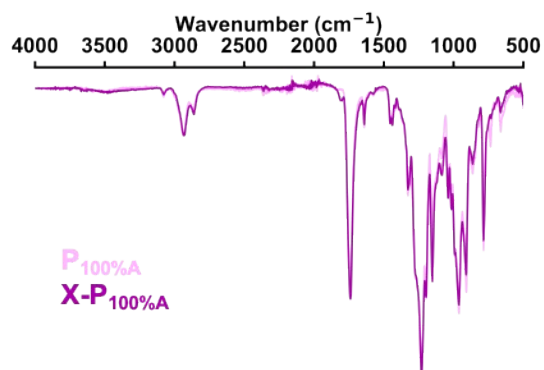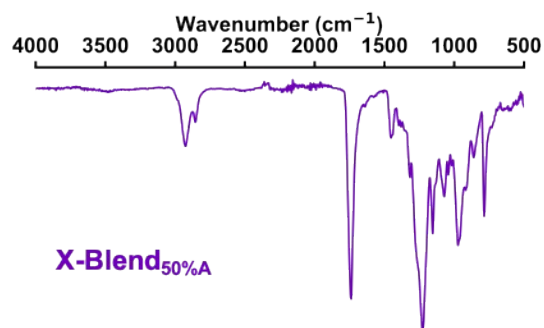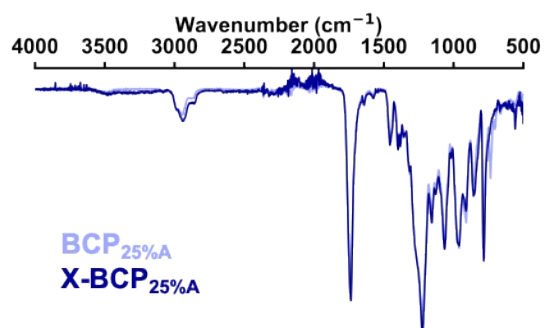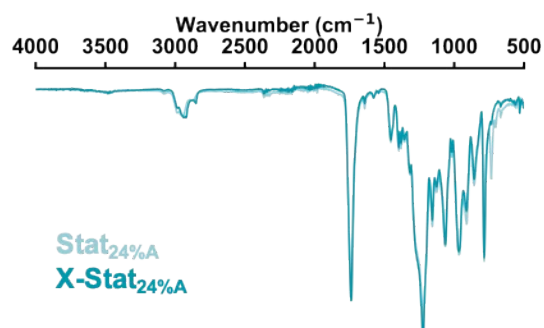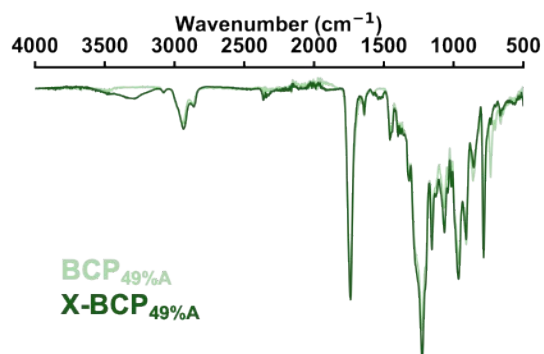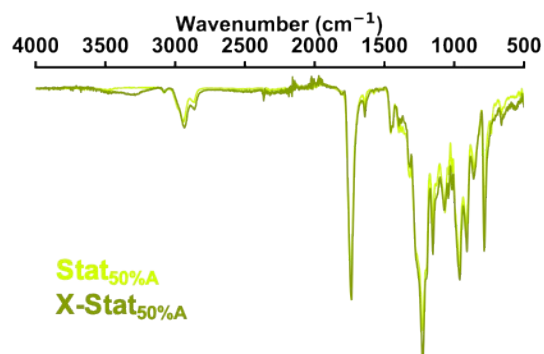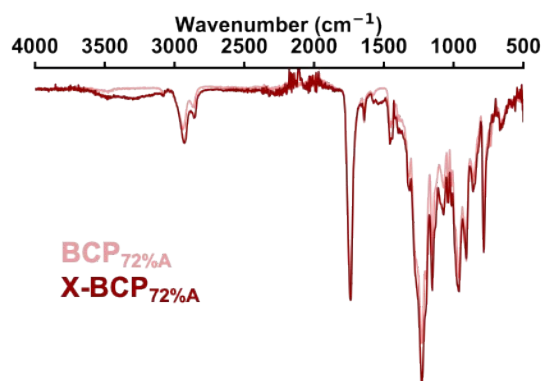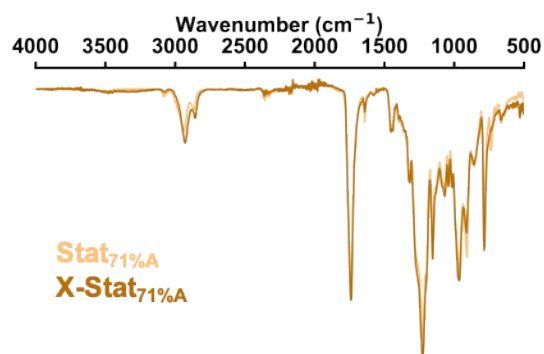

**Figure S16.** FTIR comparing pristine polymer (light trace) to printed polymer (dark trace).

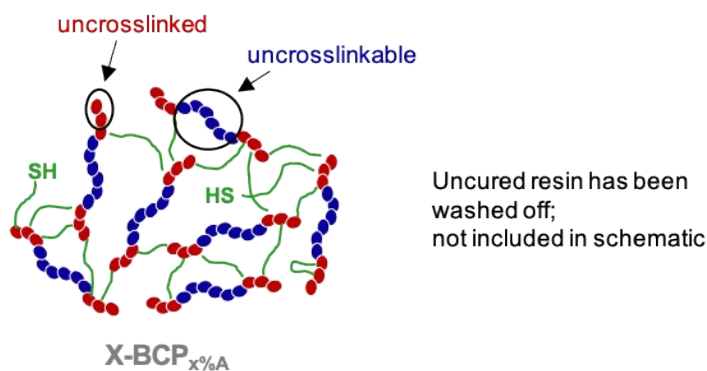

**Figure S17.** Schematic of uncrosslinked and uncrosslinkable polymer.

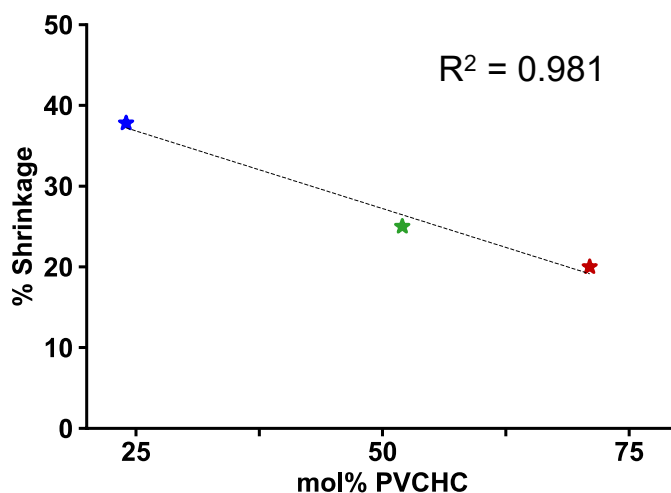

**Figure S18.** Plot of % shrinkage vs mol% PVCHC, as calculated by dividing the dry length by the original print dimensions (30 mm).

**Table S5.** Crosslinked polymer thermal properties and swelling ratio.

| Polymer                | T <sub>g</sub> (°C) | T <sub>d</sub> (°C) | <sup>a</sup> Mass Loss (%) | <sup>b</sup> Swelling Ratio (%) |
|------------------------|---------------------|---------------------|----------------------------|---------------------------------|
| X-P <sub>100%A</sub>   | --                  | 332, 369            | 43                         | 140 ± 3                         |
| X-BCP <sub>25%A</sub>  | -7.9                | 301, 360*           | 81                         | 411 ± 18                        |
| X-BCP <sub>49%A</sub>  | 2.5                 | 310, 365            | 53                         | 157 ± 6                         |
| X-BCP <sub>72%A</sub>  | --                  | 323, 369            | 39                         | 108 ± 11                        |
| X-Stat <sub>24%A</sub> | 5.2                 | 313, 360*           | 85                         | 326 ± 10                        |

|                        |     |          |    |        |
|------------------------|-----|----------|----|--------|
| X-Stat <sub>50%A</sub> | 9.0 | 324, 384 | 49 | 80 ± 7 |
| X-Stat <sub>71%A</sub> | --  | 334, 384 | 51 | 97 ± 6 |

[a] Total % mass loss in each step. [b] n=3

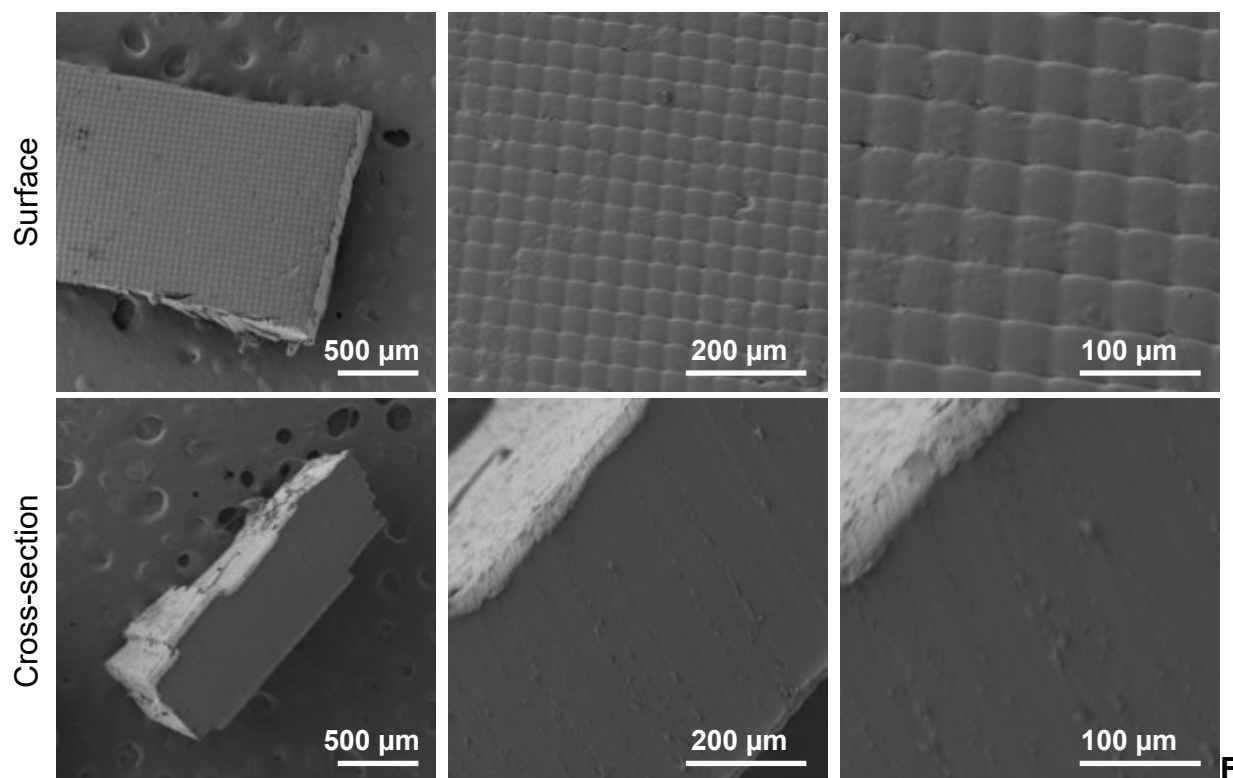

**figure S19.** SEM images of surface and cross-section of X-BCP<sub>25%A</sub>.

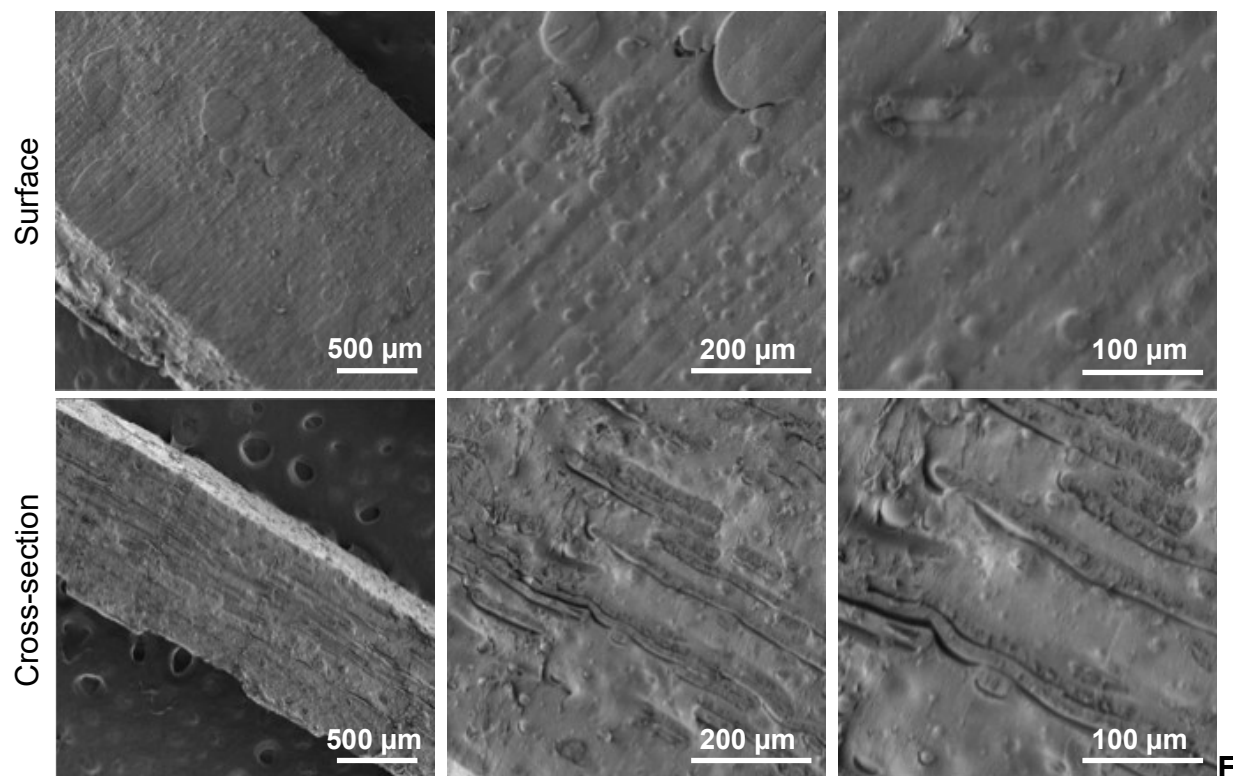

**figure S20.** SEM images of surface and cross-section of X-BCP<sub>49%A</sub>.

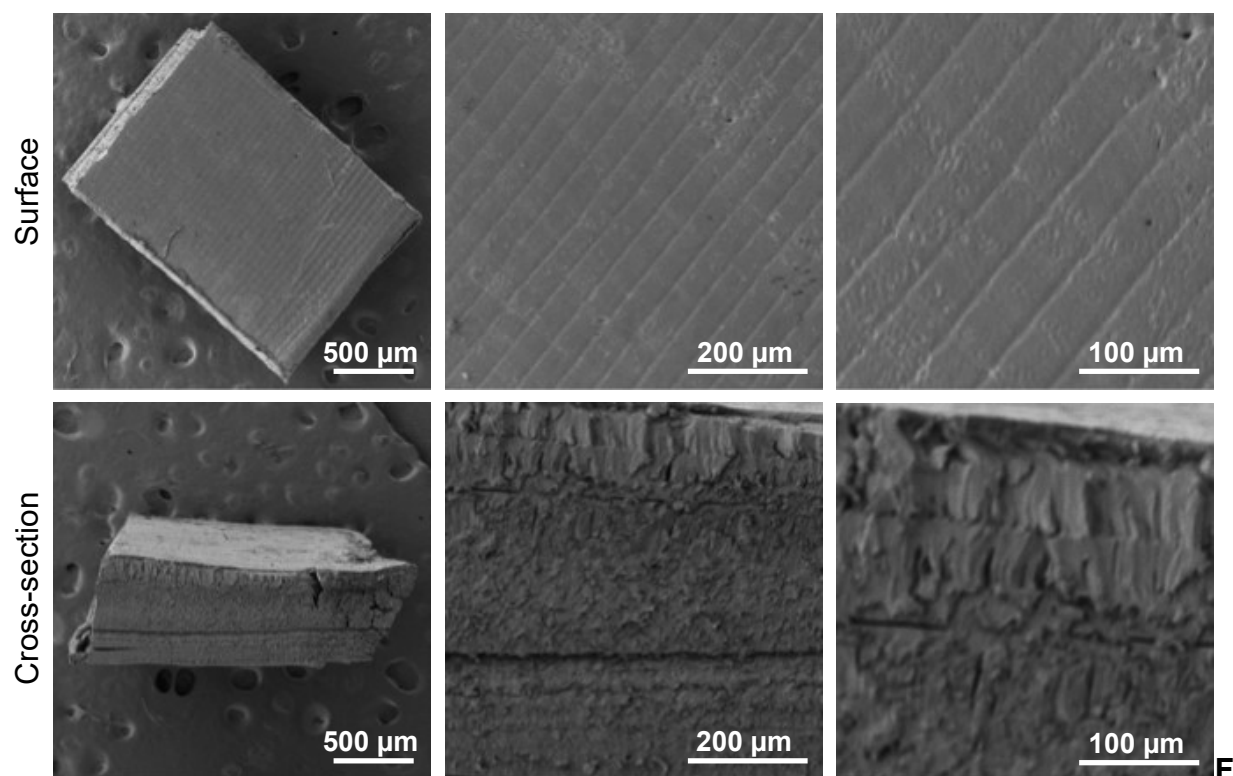

**figure S21.** SEM images of surface and cross-section of X-BCP<sub>72%A</sub>.

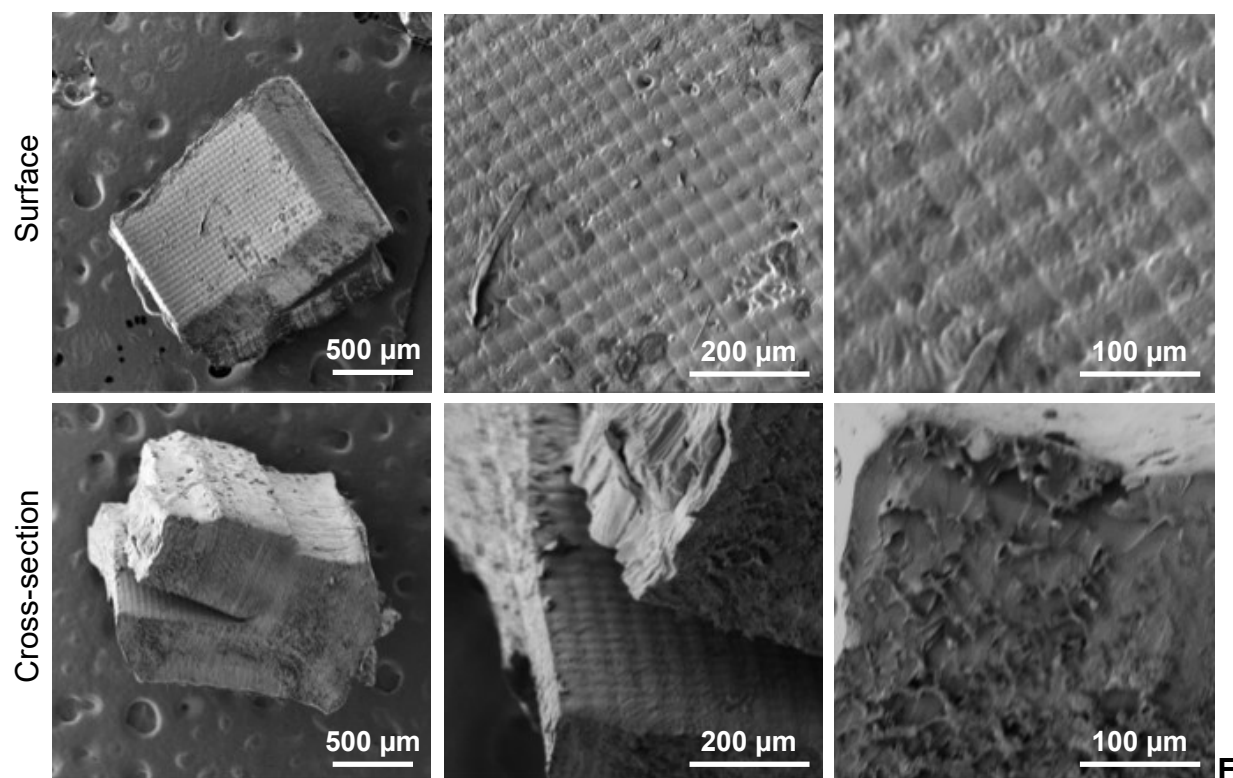

**Figure S22.** SEM images of surface and cross-section of X-Stat<sub>50%A</sub>.

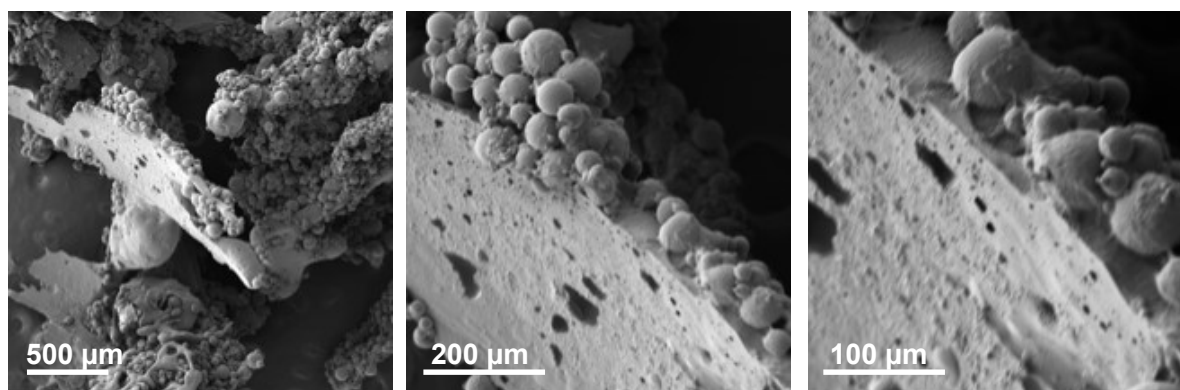

**Figure S23.** SEM images of surface and cross-section of X-Blend<sub>50%A</sub>.

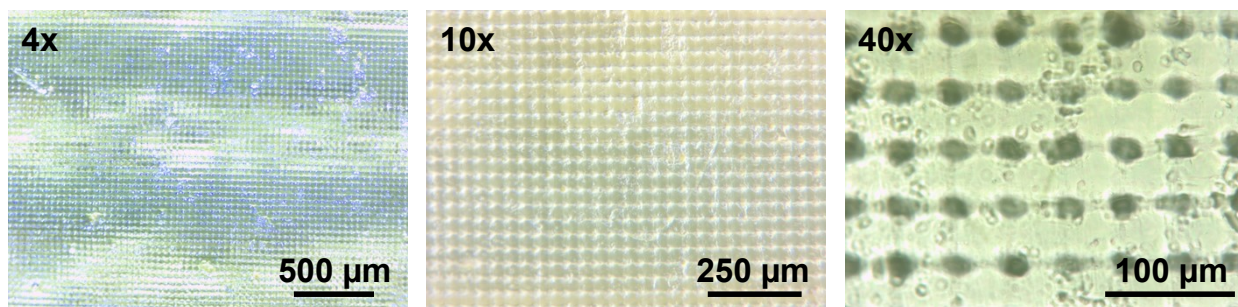

**Figure S24.** Optical microscopy images of the surface of X-BCP<sub>49%<sup>H</sup></sub> showing ~50  $\mu\text{m}$  resolution.

## 2.2. Thermal and mechanical properties of printed structures

**Table S6.** Comparison of thermal properties of pristine polymers and their corresponding prints.

| Polymer                         | $T_g$ ( $^{\circ}\text{C}$ ) |       | $T_d$ ( $^{\circ}\text{C}$ ) |           | Enthalpy Recovery (J/g) |          |
|---------------------------------|------------------------------|-------|------------------------------|-----------|-------------------------|----------|
|                                 | Pristine                     | Print | Pristine                     | Print     | Pristine                | Print    |
| P <sub>0%A</sub>                | 34                           | N/A   | 250                          | N/A       | 2.26                    | N/A      |
| <sup>a</sup> P <sub>100%A</sub> | 108                          | --    | 315                          | 332, 369  | 1.92                    | --       |
| Blend <sub>50%A</sub>           | 36, 113                      | 28.1  | 237, 303                     | 336, 364  | 1.03, 0.85              | 0.19, -- |
| BCP <sub>25%A</sub>             | 34                           | -7.9  | 278                          | 301, 360* | 1.33                    | 1.29     |
| BCP <sub>49%A</sub>             | 38, 81                       | 2.5   | 255, 309                     | 310, 365  | 0.63                    | 0.58     |
| BCP <sub>72%A</sub>             | 66                           | --    | 300                          | 323, 369  | --                      | --       |
| Stat <sub>24%A</sub>            | 39                           | 5.2   | 247                          | 313, 365* | 1.92                    | 1.73     |
| Stat <sub>50%A</sub>            | 63                           | 9.0   | 286                          | 324, 384  | 1.37                    | 1.46     |
| Stat <sub>71%A</sub>            | 79                           | --    | 283                          | 334, 384  | 2.06                    | --       |

[a] "Print" is P<sub>100%A</sub> that is cured as a bulk liquid, not printed

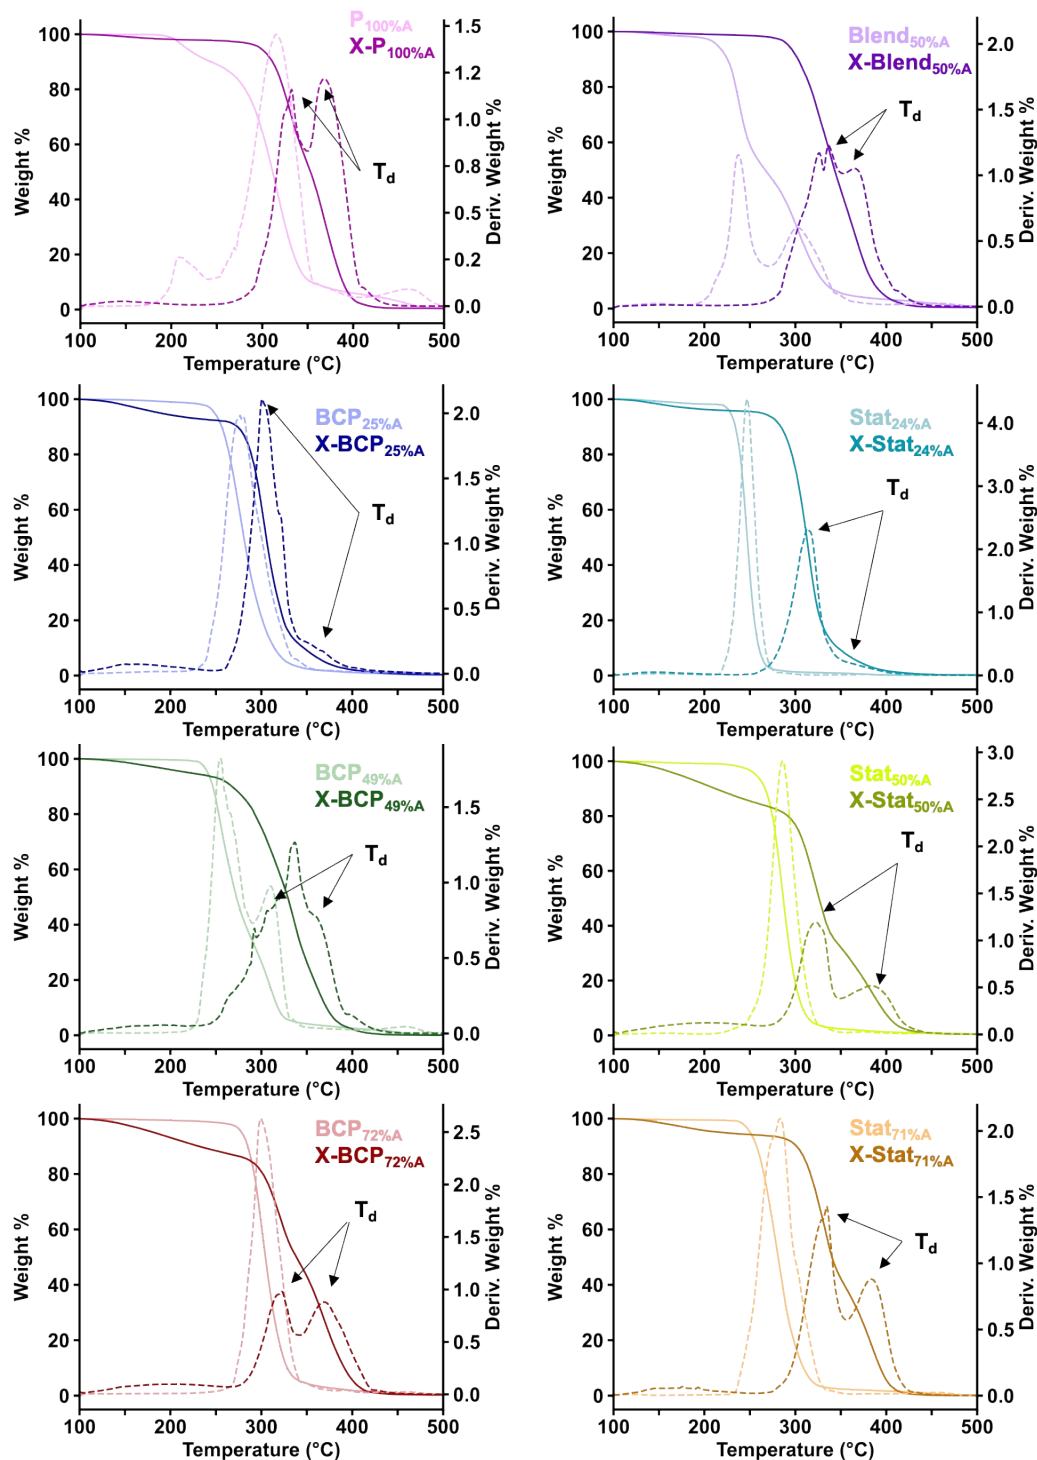

**Figure S25.** TGA weight loss profiles comparing pristine polymer (lighter color trace) to printed polymer (darker color trace), with first derivative of weight loss (dashed lines of corresponding colors). X-BCP<sub>49%A</sub> indicates  $T_d$ 's as the peaks of the deconvoluted derivative trace. X-Blend<sub>50%A</sub> reports  $T_d$  as a single peak in the middle of the decomposition step.

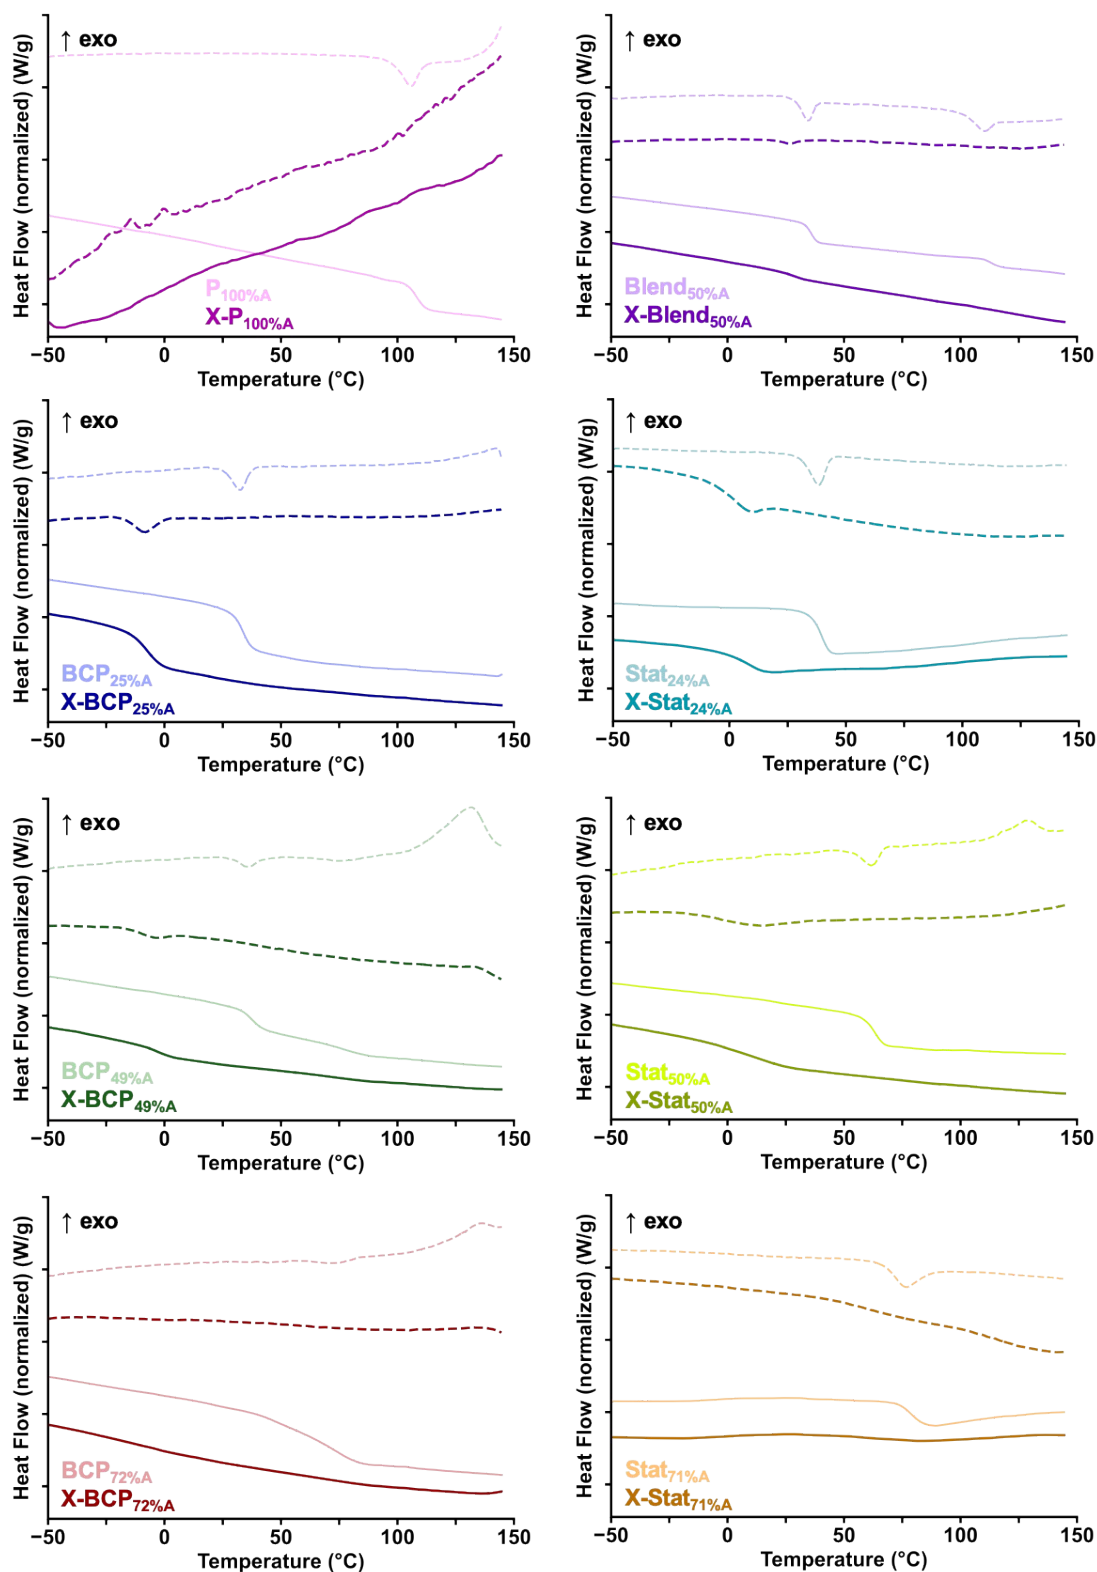

**Figure S26.** Modulated DSC comparing pristine polymer (light trace) to printed polymer (dark trace), separated into normalized non-reversing (dashed) and reversing (solid) heat flow. Y-axis tick marks are 0.02 W/g for all plots.

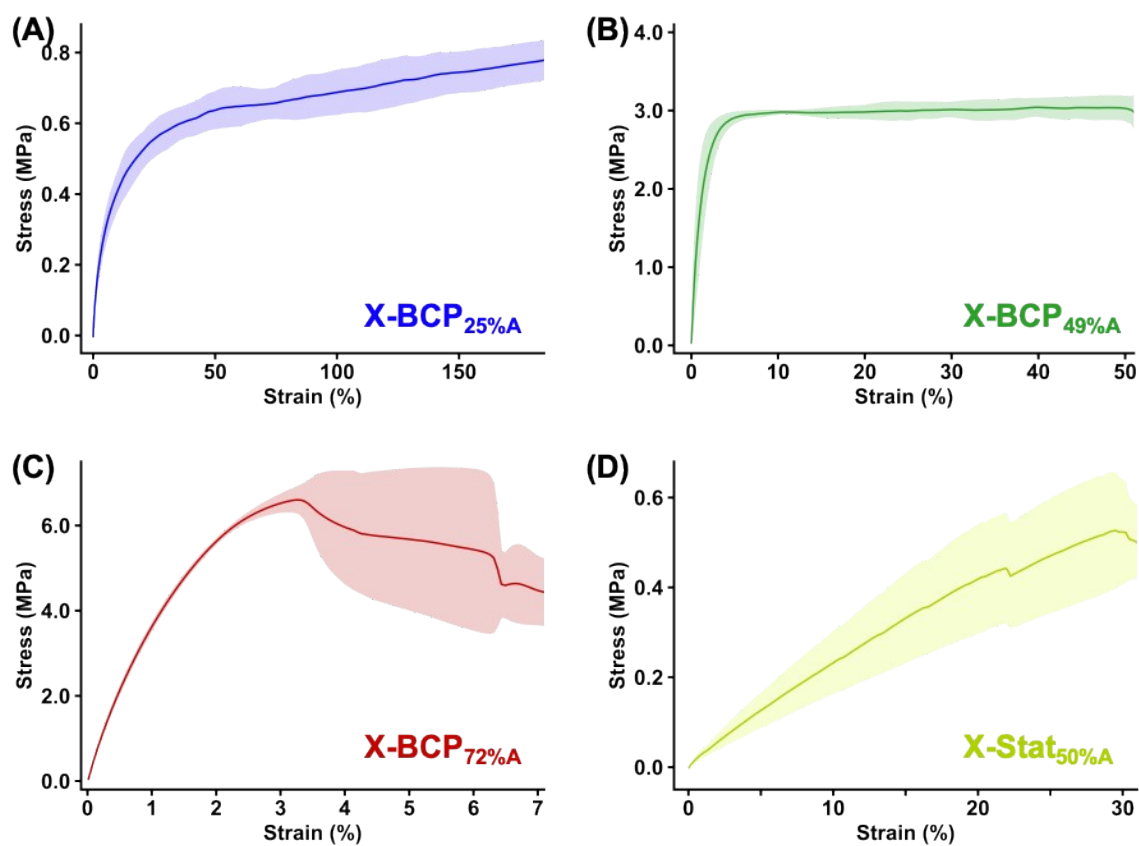

**Figure S27.** Full-scale plots of tensile test for (A) X-BCP<sub>25%A</sub>, (B) X-BCP<sub>49%A</sub>, (C) X-BCP<sub>72%A</sub>, and (D) X-Stat<sub>50%A</sub>. Shaded area shows deviation of three samples.

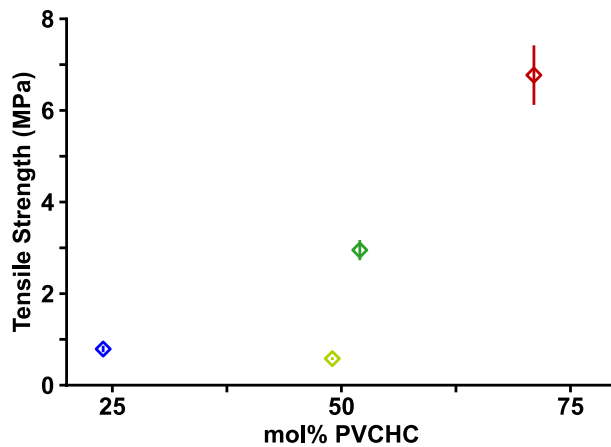

**Figure S28.** Tensile strength of printed resins based on mol% PVCHC.

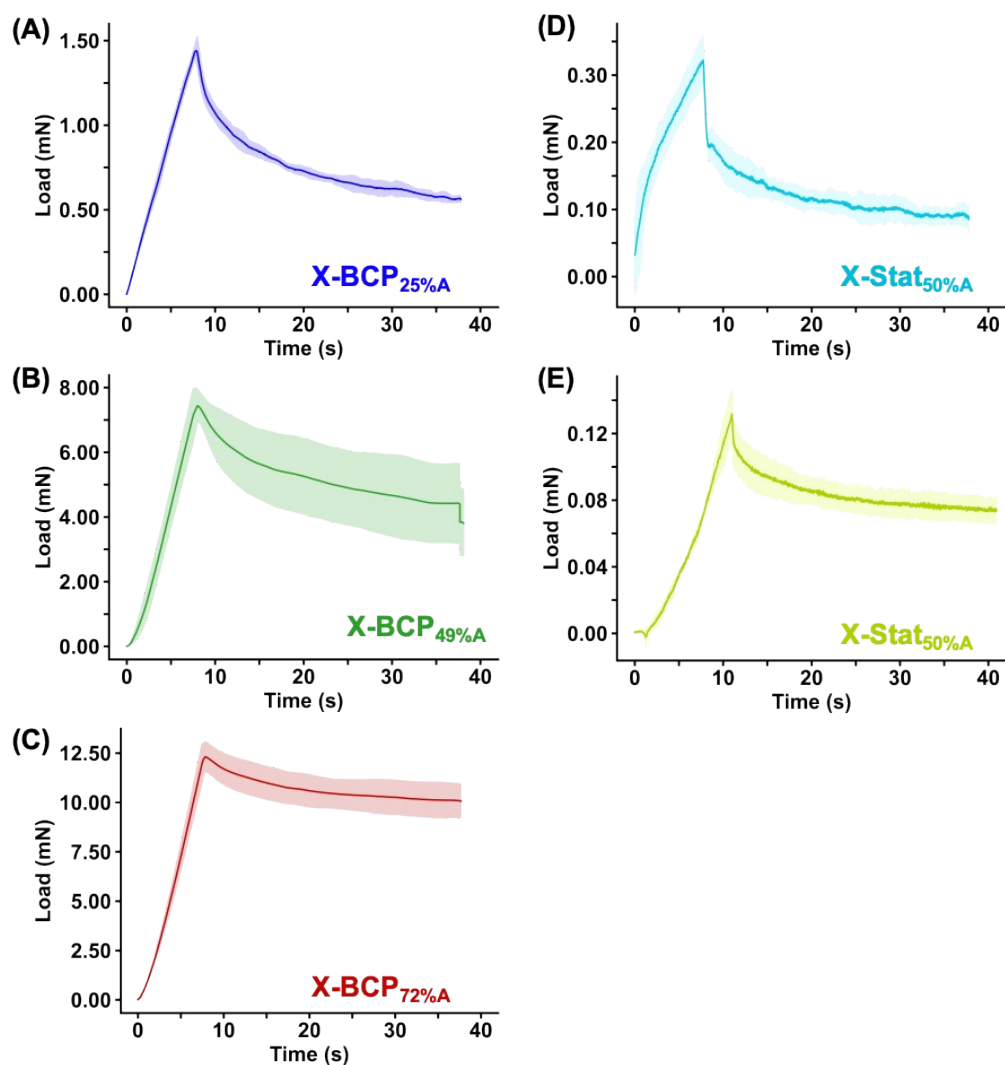

**Figure S29.** Full-scale plots of load vs time by nanoindentation for (A) X-BCP<sub>25%A</sub>, (B) X-BCP<sub>49%A</sub>, (C) X-BCP<sub>72%A</sub>, (D) X-Stat<sub>24%A</sub>, and (E) X-Stat<sub>50%A</sub>. Shaded area shows standard deviation of three sample.

**Table S7.** Complete nanoindentation results.

| Polymer                | Maximum Load (mN) | Final Load after Hold (mN) | Total Relaxation (mN) | Percent Relaxation (%) | Hardness (GPa) | <sup>d</sup> Young's Modulus (MPa) |
|------------------------|-------------------|----------------------------|-----------------------|------------------------|----------------|------------------------------------|
| X-BCP <sub>25%A</sub>  | 1.47 ± 0.05       | 0.61 ± 0.03                | 0.85 ± 0.06           | 58 ± 3                 | 0.117 ± 0.004  | 6.6 ± 0.4                          |
| X-BCP <sub>49%A</sub>  | 7.17 ± 0.18       | 3.95 ± 0.70                | 3.22 ± 0.72           | 45 ± 8                 | 1.0 ± 0.3      | 31 ± 2                             |
| X-BCP <sub>72%A</sub>  | 12.3 ± 0.8        | 10.4 ± 0.8                 | 2.0 ± 1.1             | 16 ± 2                 | 2.5 ± 0.3      | 51 ± 3                             |
| X-Stat <sub>24%A</sub> | 0.329 ± 0.027     | 0.085 ± 0.014              | 0.244 ± 0.030         | 74 ± 11                | 0.018 ± 0.003  | 1.7 ± 0.2                          |
| X-Stat <sub>50%A</sub> | 0.136 ± 0.013     | 0.079 ± 0.007              | 0.057 ± 0.015         | 42 ± 6                 | 0.015 ± 0.001  | 0.58 ± 0.04                        |

### 3. Hydrolysis of printed objects

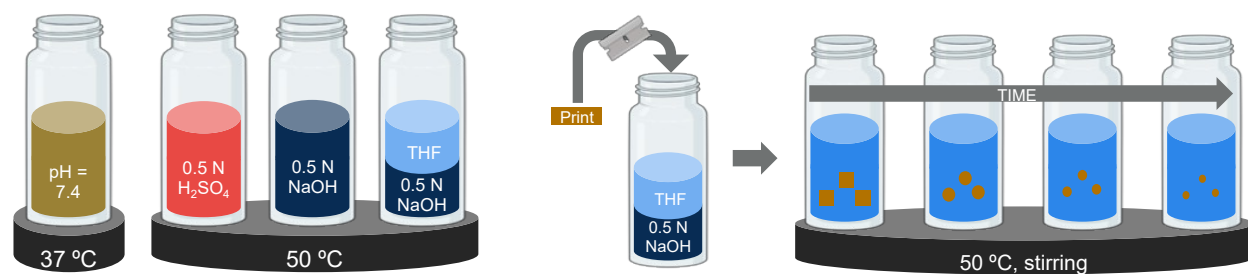

**Figure S30.** Cartoons demonstrating hydrolysis conditions employed in this study.

**Table S8.** Hydrolysis results in various conditions for X-BCP<sub>49%A</sub>

| Condition                            | Temperature (°C) | Time in Solution (days) | % Remaining (n=3) |
|--------------------------------------|------------------|-------------------------|-------------------|
| pH = 7.4                             | 37               | 60                      | 97.2 ± 0.5        |
| 0.5 N H <sub>2</sub> SO <sub>4</sub> | 50               | 7                       | 92.6 ± 1.7        |
| 0.5 N NaOH                           | 50               | 7                       | 17.0 ± 6.2        |
| 0.5 N NaOH + THF (1/1 v/v)           | 50               | 7                       | 0.0 ± 0.0         |

**Table S9.** Hydrolysis results for prints in 0.5 N NaOH + THF (1/1 v/v) at 50 °C (n=3).

| Sample                 | Time till Hydrolyzed (days) |
|------------------------|-----------------------------|
| X-BCP <sub>25%A</sub>  | 1                           |
| X-BCP <sub>49%A</sub>  | 2                           |
| X-BCP <sub>72%A</sub>  | 4                           |
| X-Stat <sub>50%A</sub> | 3                           |

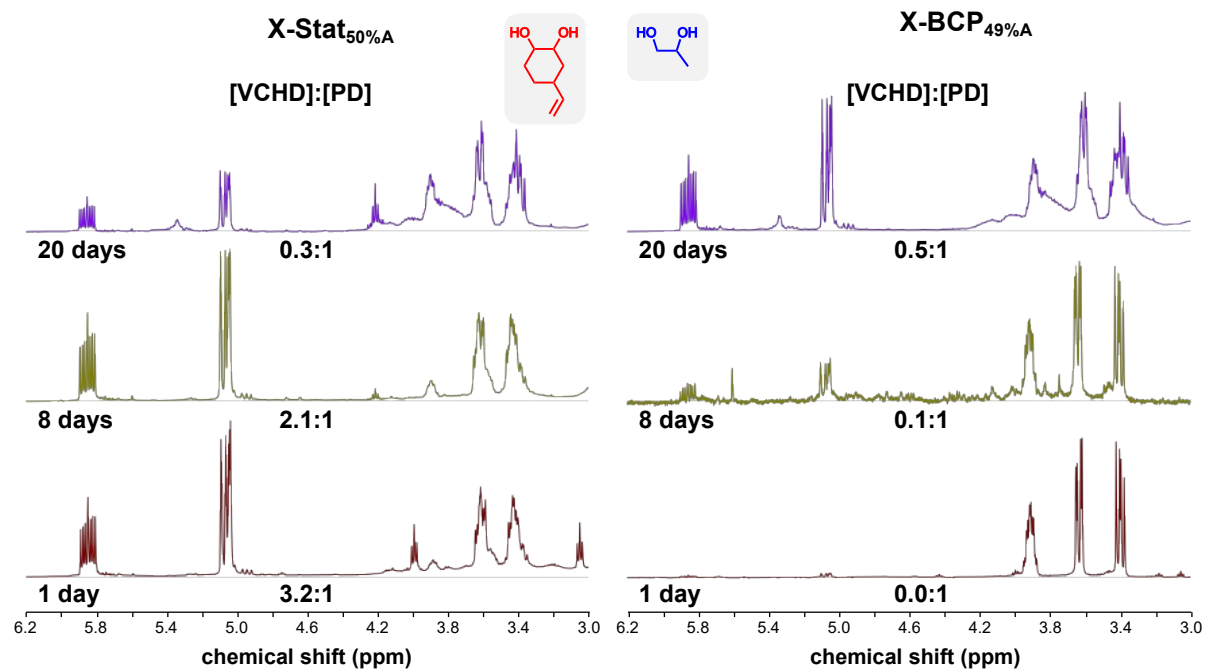

**Figure S31.** Hydrolysis  $^1\text{H}$  NMR for X-Stat<sub>50%A</sub> and X-BCP<sub>49%A</sub> in 0.1 N NaOH + THF (1:1 v/v) at 50 °C.

#### 4. References:

- (1) Fox, T. G. Influence of Diluent and of Copolymer Composition on the Glass Temperature of a Polymer System. *Bull. Am. Phys. Soc.* **1956**, 1.
